# Supplementary material for: Qualitative study exploring patients experiences of being diagnosed and living with primary bone cancer in the UK
Source: PubMed Central journal article supplement — BMJ Open. 2019 Sep 24;9(9):e028693. doi: 10.1136/bmjopen-2018-028693 (PMC6773292; doi:10.1136/bmjopen-2018-028693), 2019-09-24
Supplement: bmjopen-2018-028693.draft_revisions.pdf [file bmjopen-2018-028693.draft_revisions.pdf]

# BMJ Open

BMJ Open is committed to open peer review. As part of this commitment we make the peer review history of every article we publish publicly available.

When an article is published we post the peer reviewers' comments and the authors' responses online. We also post the versions of the paper that were used during peer review. These are the versions that the peer review comments apply to.

The versions of the paper that follow are the versions that were submitted during the peer review process. They are not the versions of record or the final published versions. They should not be cited or distributed as the published version of this manuscript.

BMJ Open is an open access journal and the full, final, typeset and author-corrected version of record of the manuscript is available on our site with no access controls, subscription charges or pay-per-view fees (<http://bmjopen.bmj.com>).

If you have any questions on BMJ Open's open peer review process please email [editorial.bmjopen@bmj.com](mailto:editorial.bmjopen@bmj.com)

# BMJ Open

## A qualitative study exploring patients experiences of being diagnosed and living with primary bone cancer

|                               |                                                                                                                                                                                                                                                                                                                                                                                                                                                                                                                                                                                                                                                                                                                                                                                                                                |
|-------------------------------|--------------------------------------------------------------------------------------------------------------------------------------------------------------------------------------------------------------------------------------------------------------------------------------------------------------------------------------------------------------------------------------------------------------------------------------------------------------------------------------------------------------------------------------------------------------------------------------------------------------------------------------------------------------------------------------------------------------------------------------------------------------------------------------------------------------------------------|
| Journal:                      | <i>BMJ Open</i>                                                                                                                                                                                                                                                                                                                                                                                                                                                                                                                                                                                                                                                                                                                                                                                                                |
| Manuscript ID                 | bmjopen-2018-028693                                                                                                                                                                                                                                                                                                                                                                                                                                                                                                                                                                                                                                                                                                                                                                                                            |
| Article Type:                 | Research                                                                                                                                                                                                                                                                                                                                                                                                                                                                                                                                                                                                                                                                                                                                                                                                                       |
| Date Submitted by the Author: | 02-Jan-2019                                                                                                                                                                                                                                                                                                                                                                                                                                                                                                                                                                                                                                                                                                                                                                                                                    |
| Complete List of Authors:     | Martins, Ana; University College London Hospitals NHS Foundation Trust, Cancer Clinical Trials Unit<br>Whelan, Jeremy; University College London Hospitals NHS Foundation Trust,<br>Bennister, Lindsey ; Patient Representative<br>Fern, Lorna; University College London Hospitals NHS Foundation Trust, Oncology<br>Onasanya, Maria; Patient Representative<br>Gerrand, Craig; Royal National Orthopaedic Hospital Stanmore<br>Storey, Lesley; Queen's University Belfast Faculty of Arts Humanities and Social Sciences<br>Wells, Mary; Imperial College Healthcare NHS Trust<br>Windsor, Rachael; University College London Hospitals NHS Foundation Trust<br>Woodford, Julie ; Royal National Orthopaedic Hospital Stanmore<br>Taylor, Rachel; University College Hospitals NHS Foundation Trust, Cancer Clinical Trials; |
| Keywords:                     | patient experience, primary bone cancer, quality of life                                                                                                                                                                                                                                                                                                                                                                                                                                                                                                                                                                                                                                                                                                                                                                       |
|                               |                                                                                                                                                                                                                                                                                                                                                                                                                                                                                                                                                                                                                                                                                                                                                                                                                                |

SCHOLARONE™  
Manuscripts

1  
2  
3 **A qualitative study exploring patients experiences of being diagnosed and living with**  
4 **primary bone cancer**  
5

6  
7 Ana Martins, Jeremy S Whelan, Lindsey Bennister, Lorna A Fern, Craig Gerrand, Maria Onasanya,  
8 Lesley Storey, Mary Wells, Rachael Windsor, Julie Woodford, Rachel M Taylor  
9

10 Correspondence to:

11 Dr Ana Martins

12 UCLH Cancer Clinical Trials Unit, 1st Floor East, 250 Euston Road, London. NW1 2PG

13 Telephone number: 02034478831

14 Email: [ana.martins1@nhs.net](mailto:ana.martins1@nhs.net)  
15  
16

17  
18 Ana Martins, Research Associate, Cancer Division, University College London Hospitals NHS  
19 Foundation Trust, London NW1 2PG  
20

21 Jeremy S Whelan, Professor of Cancer Medicine, Cancer Division, University College London  
22 Hospitals NHS Foundation Trust, London NW1 2PG  
23

24 Lindsey Bennister, MQ: Transforming Mental Health, London EC1Y 0TH, United Kingdom  
25

26 Lorna A Fern, Teenage and Young Adult Researcher and Patient/Public Involvement Lead, National  
27 Cancer Research Institute Teenage, Young Adult and Germ Cell Clinical Studies Group, Cancer  
28 Division, University College London Hospitals NHS Foundation Trust, London NW1 2PG  
29

30 Maria Onasanya, Patient representative  
31

32 Craig Gerrand, Consultant Orthopaedic Surgeon, London Sarcoma Service, Royal National  
33 Orthopaedic Hospital, Stanmore, Middlesex HA7 4LP  
34

35 Lesley Story, School of Psychology, Queens University Belfast, Belfast, BT7 1NN, United Kingdom  
36

37 Mary Wells, Nursing Directorate, Imperial College Healthcare NHS Trust, Charing Cross Hospital,  
38 London, W6 8RF, United Kingdom  
39

40 Rachael Windsor, Consultant Paediatric and Adolescent Oncologist, Children and Young People's  
41 Cancer Service, University College London Hospitals NHS Foundation Trust, London NW1 2PG  
42

43 Julie Woodford, Sarcoma Unit, Royal National Orthopaedic Hospital NHS Trust, Stanmore,  
44 Middlesex, HA7 4LP, United Kingdom  
45

46 Rachel M Taylor, Senior Research Fellow, Cancer Division, University College London Hospitals  
47 NHS Foundation Trust, London NW1 2PG  
48  
49

50  
51 Word count: 8185  
52  
53  
54  
55  
56  
57  
58  
59  
60

## ABSTRACT

**Objective:** The aim of this study is to explore the experiences of patients with primary bone cancer.

**Design:** Qualitative study design using semi-structured interviews and focus groups.

**Setting:** Hospitals across the United Kingdom (UK) and recruitment through UK sarcoma charities and support groups.

**Methods:** Semi-structured telephone/face-to-face interviews and focus groups with a purposive sample of 26 participants. Data were analysed using Framework Analysis.

**Participants:** Patients with primary bone cancer aged 13-77 years. The majority were male (69%), white (85%); diagnosed within 4 years (54%); and had lower limb sarcoma (65%). Ten participants had undergone an upper/lower limb amputation (39%).

**Results:** The health-related quality of life domains of physical, emotional and social well-being and healthcare professionals' role were the overarching themes of analysis. The physical domain anchored patient experiences. The intensity and length of treatment, the severity of side-effects, the level of disability after surgery and the uncertainty of their prognosis had an impact on patient's self-image, confidence, mood and identity, and caused disruption to various aspects of the patients' social life, including their relationships (emotional and sexual) and participation in work/school and leisure activities. Adaptation was influenced by the way patients dealt with stress and adversity, with some finding a new outlook in life, and others struggling with finding their 'new normal'. Family and friends were the main source of support. Healthcare professional's expertise and support was critical. Rehabilitation services had a considerable role in patient's physical and emotional well-being, but inequitable access to these services was apparent.

**Conclusions:** This study described the impact of primary bone cancer on patients' well-being and adjustment over time with the identification of influencing factors of better/worse experiences. It showed impact was felt after end of treatment and affected patients at different life stages. Holistic models of survivorship care are needed.

Strengths and limitations of this study

- This study is an in-depth exploration of the experiences of 26 patients with primary bone cancer
- The study population varied considerably by age at, and time from, diagnosis, gender and anatomical location
- This study includes the experience of patients who had undergone amputation and other surgical interventions and treatment types
- Self-selected participants might not be representative of the experiences of patients with bone sarcoma, but our findings are consistent with previous studies and add to the research by identifying the role of influencing factors of better/worse experiences

**Keywords:** patient experience; primary bone cancer; quality of life

**A funding statement:**

This work was supported by Sarcoma UK (grant number SUK102.2016LG) and Bone Cancer Research Trust (grant number BCRT/49/16). RMT is funded by the National Institute for Health Research; LAF is funded by Teenage Cancer Trust. None of the funders were involved in conducting this review or drafting this manuscript. MW acknowledges support from the Imperial Biomedical Research Centre (BRC). JSW/RMT acknowledge support from University College London Hospitals BRC. The views are of the authors and do not necessarily reflect those of Sarcoma UK or Bone Cancer Research Trust, the NIHR/NHS or Teenage Cancer Trust.

**A competing interest statement:**

None declared

**Acknowledgements:**

We would like to thank all the Principal Investigators at the Trusts opened for recruitment - Dr Fiona Cowie; Dr Helen Hatcher; Mr Amit Kumar; Dr Dan Stark; Mr Craig Gerrand; Mr Robert Ashford; Ms Claire McKenzie; Ms Sarah Massey; Ms Julie Woodford; Mr Jonathan Gregory; Dr Robin Young; Dr Mariam Jafri; Dr Paula Wilson; Mr Robert Ashford; Dr Nicola Keay; Mr Paul Cool. We would also want to thank all the professionals involved in patient recruitment.

**Author contributions:**

RMT, LAF, MW, LS, RW, JW, CG and JSW were involved in developing the protocol; AM coordinated the running of the study and was responsible for data acquisition; AM, MW, JW and CG contributed to the analysis; AM, MW and CG drafted the manuscript. All authors critically revised and approved the final manuscript.

**Ethics Approval:**

The Study was approved by the London Stanmore NHS Research Ethics Committee (reference: 16/LO/2152).

**Data Availability:**

No additional data available.

## INTRODUCTION

Primary bone cancer (PBC), also referred to as a bone sarcoma, is very rare and makes up approximately 0.2% of all cancers diagnosed in the United Kingdom (UK).<sup>1</sup> In 2015, 551 new patients were diagnosed with PBC in the UK.<sup>2</sup> The commonest subtypes are osteosarcoma and Ewing sarcoma, which have a relatively high incidence in children and young people, and chondrosarcomas, more common in older age groups.<sup>3</sup> There has been no major improvement in 5-year overall survival rates for patients with PBC over the past 25–30 years, with rates static at between 53 and 55%.<sup>4</sup>

To give the potential for cure, PBC requires complete surgical resection of the affected part of the bone. Thus, the patient characteristically experiences a lifelong limitation in physical activity. Less frequently, this can be achieved only by limb amputation, which leads to permanent disability. Given the high physical burden of the disease and its treatment and expectations of survival, poorer patient-reported outcomes<sup>5,6</sup> are recorded in comparison to patients with other cancer types.<sup>7</sup> For example, patients have reported poorer care experiences compared with other cancer types in the National Cancer Patient Experience Survey (NCPES).<sup>8</sup>

When conducting a literature search, it became evident that there were inconsistent findings regarding the impact PBC may have on patients.<sup>5</sup> While research has shown that patients may experience lower levels of physical functioning than population norms or control groups (e.g. other cancer groups or healthy peers), there appears to be a lack of reliable information on the impact on patient's emotional and social well-being.<sup>5</sup> Several studies comparing patients who undergo an amputation or limb sparing surgery have shown no differences in quality of life scores<sup>9,10,11,6,12,13</sup>; however there are also reports of patients who had an amputation having poorer health-quality of life scores compared with patients who had other types of surgery<sup>14</sup>. The inconsistent results are also shown in studies that report that patients who had amputations had poorer mental health<sup>15,16</sup> but better feelings of self-worth<sup>16</sup> compared with patients who had other type of surgery. Other studies have shown that those who undergo lower limb amputation tended to report more anxiety and depression.<sup>5,17</sup>

In addition to studies comparing patients who undergo an amputation and other types of surgery, there are studies comparing emotional and social well-being of patients with PBC with reference values either of general population data provided with the measure, non-cancer control data collected as part of the study or from patients with other cancer types. Overall the findings reported are also inconsistent.<sup>5</sup> Research with children and young people has shown improvement in emotional functioning over time<sup>7,18</sup>, however in studies with older patients Paredes et al.<sup>19</sup> found no improvement in cognitive and emotional well-being from diagnosis to treatment and noted that they were worse than reference norms. No clear pattern can sufficiently explain these inconsistencies, although methodological differences including range of assessment tools used,

1  
2  
3 outcome variables measured, as well as diagnosis, anatomical location, treatment, and age groups  
4 have to be taken into consideration.<sup>5</sup>  
5

6 Given the complexity and heterogeneity within the patient population<sup>5,20</sup> more research is  
7 needed to explore patients' experiences of PBC. While qualitative research addressing the effects  
8 of PBC is sparse, literature has shown the adverse impact of having PBC on patient's emotional  
9 and social well-being. Studies focusing on employment<sup>21, 22</sup>, and the long-term effects of bone  
10 cancer on current daily life, body image, future possibilities and identity<sup>23,24,25</sup> provide some insights  
11 into patients' experiences, but they concentrate on specific time points or specific aspects of the  
12 patient experience (e.g. body image).  
13  
14  
15  
16

17 Both qualitative and quantitative studies shed light on the impact of PBC on patients' quality  
18 of life; however more research is needed to understand in-depth, how patients of different ages,  
19 genders and treatment experiences live with and beyond PBC.<sup>5</sup> The aim of the current study was to  
20 explore the experiences of patients with PBC across the UK.  
21  
22  
23  
24

## 25 **METHODS**

### 26 **Design and Patient Involvement**

27 This was a qualitative study involving patients with PBC, conducted as part of a larger  
28 qualitative study to develop a sarcoma patient-reported outcome measure – the Sarcoma  
29 Assessment Measure (SAM).  
30  
31  
32

33 As the Sarcoma Assessment Measure is about patient experience of being diagnosed and  
34 living with sarcoma, patient involvement is central part of the study. Initially, the SAM research team  
35 included the Chief Executive of Sarcoma UK (Lindsey Bennister), who represented the patient  
36 perspective in the design of the study. Lindsey Bennister will continue to be involved in the study as  
37 a patient representative. Maria Onasanya, who was diagnosed with sarcoma over 5 years ago  
38 joined the study as a co-investigator and has assisted with data analysis. Both Lindsey and Maria  
39 have assisted with data analysis and are co-authors in presentations and research papers. We are  
40 also working alongside Sarcoma UK and the Bone Cancer Research Trust to ensure patients are  
41 updated about the progress of the study (through study newsletters suitable for non-specialist  
42 audience) and they receive copies of all relevant outputs. Healthcare professionals working with  
43 patients with sarcoma have been engaged in data discussion, recruitment strategies and  
44 dissemination.  
45  
46  
47  
48  
49  
50  
51  
52  
53

### 54 **Participants and setting**

55 The study was undertaken across the UK recruiting through specialist PBC clinical teams,  
56 sarcoma charities and patient support groups. Eligible patients were those with any diagnosis of  
57 bone sarcoma, aged over 13 (current age) and were able to communicate in English.  
58  
59  
60

1  
2  
3 Patients were identified by recruiting hospitals who obtained and emailed the patient's  
4 written consent to the researcher, the researcher reaffirmed consent prior to conducting the  
5 interview. Patients less than 16 years gave their assent after consent had been received from their  
6 legal guardians.  
7  
8

9 Patients who contacted the research team after seeing information on social media from  
10 sarcoma charities were given information about the study and sent a consent form; the interviews  
11 proceeded following receipt of consent. Focus groups conducted in patient support groups were  
12 only conducted if all members consented to participate; information was given to members by the  
13 lead for the support group (either another patient or a clinical nurse specialist) and the research  
14 team were invited to the group if patients had given their consent. The study was approved by  
15 London - Stanmore Research Ethics Committee (IRAS reference: 217605).  
16  
17  
18  
19  
20  
21

## 22 **Data collection**

23 Data were collected through semi-structured individual telephone interview (conducted by  
24 AM) and focus groups (led by AM and RT) conducted in sarcoma support group meetings (AM and  
25 RT are experienced researchers and were not involved in the patient's care). Young people less  
26 than 16 years took part in face-to-face interviews (parents were present during the interview). The  
27 interview schedule was developed from the literature and expert opinion (patients and healthcare  
28 professionals). This was not prescriptive and was purposefully flexible to enable the researcher to  
29 explore new and emerging experiences<sup>26</sup>. This topic guide was shared with participants prior to the  
30 interview (Appendix 1), so they knew the topics covered (this allowed participants to decide whether  
31 they wanted to talk about the topics covered and gave them more control over the process). With  
32 permission, all interviews and focus groups were recorded and transcribed verbatim. Interviews  
33 lasted between 26 and 96 minutes and focus groups lasted 2 hours. Field notes were taken during  
34 and after the focus groups.  
35  
36  
37  
38  
39  
40  
41  
42  
43

## 44 **Data analysis**

45 Data analysis was developed in two phases. Transcripts were broadly coded into the three  
46 functional domains of quality of life defined by Taylor et al.<sup>27</sup> "subjective, multidimensional and  
47 dynamic (...) and includes aspects of physical, psychological and social function" (p1831). Data  
48 were analysed line-by-line with the aid of QSR NVivo 11, a specialist software package used to  
49 assist with data storage, management and retrieval. The coded data were entered into a framework.  
50 Within each overarching domain, data were coded into more detailed themes using in NVivo codes.  
51 For example, for the overarching theme of emotional well-being, a subtheme of coping mechanisms  
52 was identified. Data exploration of patients' experiences considering age, gender, or if the patient  
53 had an amputation, helped uncover commonalities and differences. Initial coding was reviewed by  
54 the research team and revised following discussion.  
55  
56  
57  
58  
59  
60



## RESULTS

Overall, a purposive sample of 34 of 121 patients participating in the wider Sarcoma Assessment Measure (SAM) study were diagnosed with PBC; 8 patients had craniofacial bone sarcomas and were not included in this analysis as they presented with experiences more akin to those with soft tissue head and neck sarcoma (data available from the overall study which includes patients with soft tissue sarcoma). We report here the findings from the remaining 26 participants (Table 1).

**Table 1.** Participants' characteristics

|                                          |                                                   | N  | %  |
|------------------------------------------|---------------------------------------------------|----|----|
| <b>Gender</b>                            | Male                                              | 18 | 69 |
|                                          | Female                                            | 8  | 31 |
| <b>Age at study</b>                      | M=40.5; SD=17.9, range 13-77 years;               |    |    |
|                                          | 13-24                                             | 4  | 15 |
|                                          | 25-39                                             | 11 | 42 |
|                                          | 40-65                                             | 6  | 23 |
|                                          | 66+                                               | 5  | 19 |
| <b>Age at diagnosis</b>                  | M=34.2; SD=18.1, range 8-77 years;                |    |    |
|                                          | 8-24                                              | 6  | 23 |
|                                          | 25-39                                             | 14 | 54 |
|                                          | 40-66+                                            | 6  | 23 |
| <b>Marital status</b>                    | Married/civil partnership/cohabiting              | 13 | 50 |
|                                          | Single                                            | 9  | 35 |
|                                          | Other                                             | 4  | 15 |
| <b>Employment</b>                        | Employee full-time/part-time job                  | 10 | 38 |
|                                          | Full-time education at school, college/university | 5  | 19 |
|                                          | Wholly retired from work                          | 5  | 19 |
|                                          | Other                                             | 6  | 23 |
|                                          |                                                   |    |    |
| <b>Ethnicity</b>                         | White British/any other white background          | 22 | 85 |
|                                          | Other                                             | 4  | 15 |
| <b>Time from diagnosis</b>               | 0-4 (years)                                       | 14 | 54 |
|                                          | 5-20+ (years)                                     | 12 | 46 |
| <b>Treatment status</b>                  | On treatment                                      | 5  | 19 |
|                                          | Off treatment                                     | 21 | 81 |
| <b>Where in the body was the sarcoma</b> | Lower limb +/- other site                         | 19 | 73 |
|                                          | Upper limb +/- other site                         | 5  | 19 |
|                                          | Spine +/- other site                              | 2  | 8  |
| <b>Treatment Type</b>                    | Surgery alone                                     | 8  | 31 |
|                                          | Surgery and chemotherapy                          | 12 | 46 |
|                                          | Surgery, radiotherapy and chemotherapy            | 4  | 15 |
|                                          | Surgery and radiotherapy                          | 1  | 4  |
|                                          | Chemotherapy and radiotherapy                     | 1  | 4  |
| <b>Amputation</b>                        | Yes                                               | 10 | 39 |
|                                          | No                                                | 16 | 61 |

Four overarching themes structured the analysis: the health-related quality of life domains of physical, emotional and social well-being and the role of healthcare professionals. More detailed analysis revealed that the experience of sarcoma in relation to the quality of life domains was

1  
2  
3 particularly influenced by the patient's stage in life (i.e. if they were a teenager, young or older  
4 adult), the individual's coping strategies and social support, the nature and extent of adaptation that  
5 had to be made as a result of illness (referred to as the adaptive tasks of illness), and where they  
6 were in their disease trajectory (e.g. diagnosis, treatment, end of treatment, follow up, or  
7 recurrence). These will be described throughout the presentation of results below.  
8  
9  
10

11  
12  
13 **Physical Well-being: *it was literally the worst pain I'd ever experienced***

14 The physical domain anchored patient experiences and the impact of PBC on emotional and  
15 social well-being. The intensity of treatment (surgery, cycles of chemotherapy and/or radiotherapy),  
16 the severity of side-effects, the length of treatment or the level of disability after surgery were some  
17 of the key features of PBC influencing the experiences described by patients.  
18  
19

20 Patients faced specific challenges at different points in their treatment pathway. Starting with  
21 diagnosis, many explained the onset of pain as the trigger to seek help. During treatment, the  
22 majority of those who had chemotherapy gave vivid descriptions of how debilitating their treatment  
23 was and some experienced frequent hospitalisations between chemotherapy cycles. Patients who  
24 received radiotherapy talked also about fatigue and burning sensations as negative side effects of  
25 treatment. The range and magnitude of side effects described during the interviews reflected the  
26 significant impact of treatment on physical well-being, including: mouth ulcers, nausea, fatigue,  
27 (chest) infections, constipation, incontinence, diarrhoea, sepsis, tinnitus, hearing loss, anaemia,  
28 "*pins and needles in the ends of my fingers and the loss of some feeling in the ends of my fingers*",  
29 kidney and heart problems, and foot drop.  
30  
31  
32  
33  
34  
35

36 Moreover, radiotherapy and surgery were described as causing pain for varied periods of  
37 time after the treatment phase had ended. Whether patients had undergone limb sparing or  
38 amputation, pain was described as part of their lives and restricted daily activities. Pain  
39 management was particularly difficult in the first year after end of treatment. Patients with  
40 amputation found the unfamiliar sensations of 'phantom pain' particularly disconcerting.  
41  
42  
43

44 "*There doesn't seem to be a lot of options in dealing with that, especially because, for me, I don't*  
45 *have phantom pains every day, but I'll get it randomly (...) it can be quite disconcerting and painful*"  
46

47 The extensive surgery required had a profound impact on mobility, with lessened strength,  
48 instability, loss of flexibility, and poor balance. Patients described use of technical aids to their  
49 mobility such as crutches or a cane, use of a wheelchair or mobility scooter. Functional impairment  
50 caused major disruption in every aspect of the patients' life such as climbing stairs, lifting, driving,  
51 walking: "*going up and down the stairs is a job of work, to be honest. It is quite tiring*". Most patients  
52 described the frustration of not being able to be as active as before and this was felt long after end  
53 of treatment.  
54  
55  
56  
57

58 For a few patients, falls were a concern and limited their activities. In those who had  
59 experienced falls, the consequences could be severe: "*A little poodle, yapping like anything, I*  
60

1  
2  
3 *suddenly put all my weight, to jump out the way, onto my left leg and I felt it break. It just literally*  
4 *split apart”.*  
5

6 Given the impact on mobility and other everyday tasks, physiotherapy played a major role in  
7 the recovery process. It helped patients to become mobile and manage the long-term effects of  
8 surgery: *“I found that when we stopped, I got lazy with walking which would then give me more*  
9 *problems with the back and the ribs and the side so I find that I have to go and see a physio every*  
10 *six weeks”.*  
11  
12  
13

14 After lower limb amputation, as well as mobility being severely affected, patients needed to  
15 re-learn activities of daily living, including going to the toilet, taking a shower and walking. A well-  
16 fitted prosthesis was crucial to successfully gain greater mobility. If this was achieved this positively  
17 influenced their overall well-being; however, patients described having issues with their prosthesis  
18 *“My prosthesis is where I’m finding it to be quite difficult (...) I have to have a good-fitting prosthesis*  
19 *if I’m going to use it properly, and if my fitting is not correct then I can’t really do the things I want to*  
20 *do”.*  
21  
22  
23  
24

25 Even many years after end of treatment, some patients were still struggling with the impact  
26 of treatment. For example, for a young adult who was more than 5 years after treatment, the  
27 negative impact of loss of memory was still evident: *“the memory thing, that’s probably the one that*  
28 *affects me the most (...) it’s probably got a little bit worse (...) Whereas before cancer, everyone*  
29 *used to remark about how good my memory was”.* The longevity and unpredictability of some of  
30 these symptoms was troubling for patients.  
31  
32  
33  
34  
35

36 **Emotional Well-being:** *I think emotional has been equally hard and challenging as the physical one*  
37

38 Patients managed the stages of treatment and the physical and emotional consequences of  
39 PBC differently, but there were some particular features of their experience at the stages of  
40 diagnosis, treatment decision-making and end of treatment, as described below. As mentioned  
41 previously, patients’ emotional well-being was significantly affected by the way in which they  
42 experienced physical symptoms and disabilities. An overriding theme was also the impact of PBC  
43 on body image.  
44  
45  
46

47 Diagnosis and treatment: *Does this get worse for each cycle because I’m already not coping*  
48

49 At diagnosis, patients described fear, shock, panic, and feeling overwhelmed, because of  
50 this understanding and taking in the information shared at this point was difficult. It helped if they  
51 were given the opportunity to ask questions later or had someone with them at hospital  
52 appointments.  
53  
54

55 During treatment, the physical impact (as described in the previous theme) was difficult to  
56 cope with and had an impact on emotional well-being: *“It was at that stage where I thought, ‘This is*  
57 *only going to get progressively worse.’ I can remember asking at the clinic ‘Does this get worse for*  
58 *each cycle because I’m already not coping?’”.*  
59  
60

1  
2  
3 All patients described how emotionally burdensome chemotherapy was due to physical  
4 impact it had on them, and gave examples of being angry and frustrated. Such feelings also had an  
5 impact on interactions with others: *“Sometimes, it [chemotherapy] makes me more responsive, a  
6 little bit angry after the chemo (...) It feels like it wasn’t in my control”*

7  
8  
9 The devastating news of having to have an amputation and the lack of other options  
10 available were distressing: *“I couldn’t really-, based on the journals that I was reading, and based on  
11 the information that was available at the time, amputation just seemed like such a life-altering  
12 decision”*. Patients managed the decision to have an amputation by focusing on how it would  
13 increase their chances of survival (*“I’m losing my leg, but I’m not losing my life”*), how it would  
14 remove the cancer from their body. Several were helped by being able to talk with patients who had  
15 had an amputation as this had made them see that it was still possible to have a *“normal”* life  
16 afterwards. One patient had also found it helpful to talk to someone who had undergone limb  
17 sparing surgery: *“having to live a life where you are constantly having to take pain-killers, is not  
18 really a good life. Although she would do it again, it’s not something she would recommend for  
19 somebody who is young”*.

20  
21  
22 End of Treatment: trying to get used to being on the other side of it

23  
24  
25 After treatment ended, the focus and structure of care which was in place while they were  
26 going through treatment disappeared and patients found this transition challenging: *“It’s difficult, sort  
27 of, coming to terms with everything (...) trying to get used to being on the other side of it and not  
28 having to deal with any of the chemo or anything”*. It was during this transition period that most  
29 reflected on what they had gone through and some did not know how to cope with their thoughts  
30 and feelings such as the uncertainty associated with the prognosis which was a source of distress  
31 for patients: *“I think it was post-traumatic (...) every little thing that went wrong, I thought it had  
32 come back (...) so then I was constantly going to the doctors all the time (...) I wasn’t sleeping very  
33 well”*.

34  
35  
36 The regular appointments and scans that were part of follow-up care were also a source of  
37 anxiety, a constant reminder of the uncertainty and potential for recurrence, with some patients  
38 finding the period before appointments extremely stressful: *“my anxiety levels peak, you know, just  
39 before my three-monthly check-up, and then once I’ve had my check-up, I, kind of, come right back  
40 down (...) next three-month, the cycle starts again (...) I would certainly say the first twelve months  
41 were awful”*. Anxiety and fear of recurrence was the emotional aspect of having a PBC that was  
42 shared by all patients as being difficult: *“you’re left in a state of uncertainty, because obviously no-  
43 one can give you a definitive five year outlook. You’re constantly having re-scans and everything.  
44 You’ve been through a very big thing and it’s not really over. It might be, but you don’t know, so that  
45 level of uncertainty is tricky at first to sort of get to grips with”*

46  
47  
48 Throughout participants’ descriptions of their experiences there was a continuous  
49 negotiation between the “old” self and the changes imposed by their diagnosis and treatment, and  
50  
51  
52  
53  
54  
55  
56  
57  
58  
59  
60

1  
2  
3 the recovery process took time: *“I was very impatient and just wanted to hurry up all the process of*  
4 *getting, sort of, back to normality, but it was a very slow process (...) you don’t get back to where*  
5 *you were before”*. Time from diagnosis influenced patient’s emotional experiences. Descriptions of  
6 feeling devastated, of losing their future, their identity were mainly present in the first two years from  
7 being diagnosed. While some patients were able to resume or continue what they were able to do  
8 before the diagnosis others found the impact on their lives completely disruptive: *“I had an*  
9 *amputation to deal with, so my identity from what I assumed I looked like had just been completely*  
10 *devastated really, because I didn’t look like the way I’d grown to-, I didn’t look like what I’d always*  
11 *looked like. I looked like something else, or someone else”*.

12  
13  
14  
15  
16  
17 For patients who had an amputation, the pressure of trying to get back to ‘normal’, and to be  
18 seen as ‘normal’, was more salient than in patients who did not have an amputation. There was a  
19 conscious knowledge that ‘normal’ was something different after the surgery and it had an impact  
20 on how they saw themselves and how others saw them. Being dependent on others was hard,  
21 undressing in public spaces took time for them to get used to. In addition to the influence of type of  
22 surgery on the patient’s experience, patient’s stage of life also influenced the emotional  
23 experiences. Young adults (i.e. patients aged up to 40 years old) who were transitioning to a new  
24 job, building romantic relationships, wanting to start a family, described their identify, expectations  
25 for the future in terms of employment, romantic relationships being changed and away from their  
26 peers. For example, this young adult reflected on the emotional impact of infertility caused by  
27 treatment: *“That made me feel really isolated from people (...) I’ve always wanted a family, so that*  
28 *has been probably the biggest thing that I’ve had to overcome. I’m still not really over it (...) it’s still*  
29 *very painful”*.

30  
31  
32  
33  
34  
35  
36  
37  
38 The experience of PBC was described as difficult and traumatic. While some patients  
39 described having low mood sometimes, others described having depression and made reference to  
40 suicidal ideation at some of their lowest points: *“I got put on the antidepressants. (...) I still suffer*  
41 *from very bad depression now (...) emotionally, I wasn’t expecting to be that demanding”*. Other  
42 emotions shared by a few patients included feeling guilty at having survived, and feeling particularly  
43 upset due to the impact of the illness on their family.

44  
45  
46  
47  
48  
49  
50  
51  
52  
53  
54  
55  
56  
57  
58  
59  
60 Besides trying to focus on positive aspects of life (with some patients stating how lucky they  
were to still be alive), there were examples of other strategies patients used to cope with their  
diagnosis, treatment and life after end of treatment including: setting up goals which gave a sense  
of control over what was happening to them; problem-solving, focusing on getting all the information  
about their diagnosis and treatment; focusing on their own children while going through treatment  
and in their rehabilitation; focusing on getting better *“Most of the time I was just like, ‘I’ve got to deal*  
*with it, and I know I can get better”*. Additionally, around half those interviewed acknowledged a  
positive change in their outlook in life *“I just became more relaxed about life, and probably*  
*appreciated small things more than a lot of people”*.

### Changes to Body Image: how much your body image affects your confidence

Throughout the interviews, there were numerous examples of the way in which PBC treatment had affected patients' physical appearance, and as a result, their confidence and identity. As one said: *"I used to be a big gym goer, had a good shape on me, nice hair (...) I lost my shape completely, ended up having to just eat crap just to stay alive, lost my hair, lost my eyebrows. I felt absolutely crap"*.

While some changes were specific to the treatment phase, others were not, and the acceptance of the altered body was an ongoing challenge for patients. It was also something that patients found difficult to discuss with loved ones. Some needed professional support to deal with the impact of body changes on their self-confidence and self-image, long after treatment had ended: *"I suppose I didn't realise how much your body image affects your confidence. You know, that was something else that I would speak to the counsellor about, that perhaps I couldn't speak about to my partner at home"*.

Adaptation or acceptance of their altered body was also influenced by other's perceptions. For example, questions about why someone was limping brought to the forefront the changed body *"The hardest thing I have is when someone says, 'Oh, you're limping. What have you done at the weekend?"*. Many patients preferred to avoid going out because they did not want to confront other people's reactions to their altered body: *"I still can't get out, or not feel good about it. Due to amputation, I don't want my wife to take me in the wheelchair somewhere here or there so, I have to wait until chemo is over and I might get a little bit better walking with my prosthetic and get a normal body"*. Others remarked on how the growth of Paralympics had a positive impact on awareness of people with prostheses by the public.

### **Social Well-being: Everyone was very supportive. Everyone came around**

As described above, the physical and emotional impact of PBC and the effect of treatment on patients' body image had a profound impact on social activity and well-being. The diagnosis, duration of treatment, frequent hospitalisations, and restrictions imposed during and after end of treatment caused disruption to various aspects of the patients' social life, including their relationships (emotional and sexual), work/school and leisure activities.

### Relationships: I've got very frustrated about things; she's dealt with that and supported me

PBC impacted on patients' relationships with family and friends. Overall, they stated that the diagnosis had brought them closer to loved ones, but for a few it meant losing contact with friends who did not support them through their experience. Patients also described a greater appreciation of the time with their loved ones after diagnosis. However, there was also an acknowledgment that sometimes patients had felt overwhelmed with treatment or its side-effects and overreacted or lost control emotionally and that there were implications on their relationships with those closer to them.

1  
2  
3 *"She's very positive with me, I must admit. When there have been times when I've got very*  
4 *frustrated about things, she's dealt with that and supported me".*

6 Family and friends had an important role supporting patients through their treatment and  
7 recovery. The support received was both practical and emotional and had a particularly salient role  
8 for different age groups. For adolescents, parents had a central role in communicating with  
9 healthcare professionals and providing emotional and practical support. Many teenagers reported  
10 receiving messages of support through social media while they were in hospital, which made a  
11 positive difference. For adults, partners or family were mentioned as being important. Extended  
12 family support was crucial, with grandparents and sometimes friends helping parents (patient and  
13 partner) with childcare during the treatment phase: *"You know, my partner still had to go to work,*  
14 *and so my mum looked after my children for me, and I'm quite fortunate".*

21 Being at home came with its own challenges and managing day to day tasks with restricted  
22 mobility was difficult for both patients and their partners, particularly when the main carer had  
23 additional caring responsibilities: *"my wife and kids, it's affected them a lot more (...) I don't get*  
24 *anybody else to look after me. It's only my wife who has to do it so, there's a lot of little things which*  
25 *is time, energy consuming and extra load on their work as well".*

28 Conversely, patients who had no partner or close family, or those with elderly parents who  
29 were not able to support them, had to rely on professional carers. When their mobility was  
30 compromised this led to social isolation: *"This severely restricts me. I only really leave the house to*  
31 *go to [family house] (...) I think I've only gone out at night, sort of, socially, since this happened*  
32 *[more than 2 years ago] probably about eight times"*

36 After the end of treatment, young adults in particular, described the interaction with new  
37 friends, romantic partners, and co-workers being challenged by the decision to disclose their  
38 diagnosis: *"I feel it's very isolating because for me it was such a personal experience that I find it*  
39 *hard to share with people".* Friends were important in making patients feel 'normal' again, by not  
40 treating them differently, by showing up and continuing to do leisure activities: *"I was still on*  
41 *crutches, and I think I turned round to him when he dropped me home and just said, 'Thank you for*  
42 *this, it just made me feel normal"* or even by using humour as described here: *"My friends still act*  
43 *the same way around me. So far I have been called Long John Silver, Hopalong Cassidy, Hoppy,*  
44 *Ironside. Basically, they're all cracking jokes about it, and that I do like".*

50 Most patients also described the benefits of being in contact with other patients, either face-  
51 to-face or online. This helped them to feel normal (*"if you hear they're struggling about certain things*  
52 *and you can relate to them, you start realising it's normal"*), share experiences and find out practical  
53 tips (e.g. travel insurance) on how to deal with specific issues linked with their diagnosis and  
54 treatment.

58 *Changes in fertility, sexuality & intimacy: I think that's sometimes a bit of an awkward subject*  
59  
60

1  
2  
3  
4  
5  
6  
7  
8  
9  
10  
11  
12  
13  
14  
15  
16  
17  
18  
19  
20  
21  
22  
23  
24  
25  
26  
27  
28  
29  
30  
31  
32  
33  
34  
35  
36  
37  
38  
39  
40  
41  
42  
43  
44  
45  
46  
47  
48  
49  
50  
51  
52  
53  
54  
55  
56  
57  
58  
59  
60

There were varied experiences of the impact of PBC on fertility, sexuality and intimacy. For those without partners, establishing intimate relationships was difficult, due to their altered body image and side-effects of treatment: *“My CNS said, ‘You can’t let this define you,’ but I don’t see how you cannot because it affects every little tiny aspect of your place in life. As we go, I just accept no woman would really have any interest in me”*. This was mainly a concern shared by participants in their twenties and thirties. For these participants the reality of infertility and the need to consider alternative methods of conceiving a child was a significant issue: *“when you’re dating, when is an acceptable time to tell a girl that you’re infertile? (...) I think, like, IVF, to me, obviously I’ve had lots of needles pushed into me and bits and pieces [but that is not the ideal way of conceiving for a woman]”*.

For patients with partners, the experience of PBC had brought them closer. If there was an impact of PBC on sexuality it was limited to the treatment phase: *“Unfortunately, that can’t happen at the moment. One of the side-effects of one of the pills I’m on is actually erectile dysfunction”*. A few had to adapt their sexual practices to accommodate their changed bodies. Older patients (patients aged 61 or older) adopted other forms of intimacy e.g. by cuddling and supporting each other, with some acknowledging that *“I mean, our sexuality had gone some good time ago to be honest, so it’s not really affected that but we’re still a close couple”*. However, even older patients described the impact of having an amputation on their sexual life long after the end of treatment. *“I think that’s more of a mind thing from my point of view, because obviously in bed, I don’t wear my prosthesis (...) we don’t really discuss it”*. A common experience for all participants irrespective of age was the lack of discussion of these issues with their clinical teams.

#### *Changes to school/university/work: physically I can’t keep it up for a long period of time*

For teenagers and young adults being in hospital disrupted school/university life: *“I haven’t been to school for three months now”*. Young people’s descriptions of returning to school showed this to be an important sign of regaining normality. The way in which teachers handled changes in the young people’s physical abilities, the phased return to school/university and support available was critical.

For adults, the financial impact of the diagnosis was dependant on the type of employment contract the patient had, the size of the company, availability of health insurance and personal savings or family financial support available *“that cleared off my mortgage and also meant that I didn’t have to go back to work full-time (...) That took away a lot of stress and worry that I potentially could have had”*. Some patients had their jobs secured for the time they were going through treatment or they were already retired, but other patients opted for early retirement or had to reduce their working hours due to fatigue or physical impairment *“I do work five days a week in our busy periods but I’ve noticed that physically I can’t keep it up for a long period of time”*. Most patients had a phased return to work due to fatigue and mobility restrictions, as well as the emotional strain of having PBC. However, the options were limited for patients who owned their business or worked as freelancers.



1  
2  
3 Even when patients were able to keep their jobs, young adults felt insecure because of lack  
4 of experience in the workplace and the uncertainty of being new in a job: *"I was really concerned*  
5 *with obviously starting a new job, the implications of this illness when I'd just started. I didn't know*  
6 *regarding sick pay and things like that, and whether they might just get rid of me".* For some patients  
7 the physical limitations/restrictions imposed by treatment/surgery led to a career change or  
8 redefinition of career aspirations: *"I had to decide to do something else, something which I could do,*  
9 *something where I could improve and where my [physical] situation wouldn't affect my career so*  
10 *badly".*

11  
12 These experiences were as a result of a combination of financial support available and the  
13 possibility to either return to work or find an alternative carer pathway. However, there were some  
14 cases where the consequences of treatment were so pervasive that patients were not able to work,  
15 had no access to family support or savings, and had to access benefits, this had a negative impact  
16 on their financial well-being: *"The effect it's had on me is I can't afford to go out anywhere. I can't*  
17 *afford to buy myself anything (...) people don't understand how tight things can be financially".*

18  
19 *Changes to participation in leisure activities: everything really changed. I used to play rugby*

20  
21 The impact of surgery and treatment on mobility affected patient's ability to participate in  
22 sports and social activities with peers and family (e.g. patients described being excluded of playing  
23 with their children). The interlinked impact of physical and social well-being resulted in a negative  
24 effect on emotional well-being: *"I was just really upset, because I want to go ice skating. I'm not*  
25 *allowed to go ice skating and it's just like, everybody else can do it, and I can't, and I'm just-, it's*  
26 *just, sort of, I was quite upset about it, because, I don't know, why did it happen to me?"*

27  
28 Managing pain whilst trying to take part in the activities they enjoyed was a challenge for  
29 patients. For example, a patient who had limb sparing surgery described how he endured the pain  
30 and restrictions imposed by it: *"I do go to [activity], but I do experience extreme pain after".*  
31 Similarly, managing fatigue and lack of energy were experienced long after the initial treatment  
32 phase for most patients. Patients identified triggers and managed their day to accommodate it, but  
33 the reality was that fatigue had a profound effect on their participation in social activities, work and  
34 school performance, as well as affecting emotional well-being: *"I'm careful about not pushing myself*  
35 *too much, but also it's quite unpredictable really. I know that if I do a lot then I will pay for it (...) I just*  
36 *allow myself to cancel plans and go to bed".*

37  
38 **The Role of Healthcare Professionals:** *They were experts in what they were doing*

39  
40 The expertise of clinical teams was valued by participants, especially if their route to  
41 diagnosis had been long and complex, which was the case for most patients. The specialist skills  
42 and experience of clinical teams restored patients' trust in the healthcare profession, as this had  
43 often been eroded by the time patients got to diagnosis. Many patients described how the  
44 healthcare team worked collaboratively to best support them.

1  
2  
3 All participants referred to being given information by the specialist team, asking questions  
4 and feeling supported. However, the timing and delivery of information was not always optimal, with  
5 some patients receiving information over the phone and then having to wait for the appointment with  
6 the specialist team to have their questions answered or concerns clarified. This was a period of  
7 distress for patients, with some looking for information online, which led to more distress. In  
8 contrast, when patients were guided towards specific online resources after meeting with their  
9 specialist clinical team, they were very positive about this.

14 The clinical nurse specialist (CNS) was a key point of contact for all patients, s/he provided  
15 practical and emotional support, information about diagnosis and treatment and support available  
16 (e.g. support groups; professional psychological support). CNS were also described as being  
17 approachable and available: *"So, if I needed help, she'd be there to help me (...) So, [CNS] was  
18 really a stable point for me to go to for any sort of information or support"*.

22 The transition from specialist centres back to receiving care in local hospitals was at times  
23 problematic, as patients felt local care teams were not knowledgeable: *"Awful. Nobody knew what to  
24 do with me (...) They weren't equipped, at all, to deal with me. Nobody would use my Hickman line"*.  
25 Where physiotherapy needs were not met by local services, some patients had to access services  
26 privately instead *"So, I suffer a dropped foot as a result (...) I was just given some exercises to do  
27 on a sheet (...) So, I've since been seeing a private physio. They've really helped and worked  
28 wonders for my leg."* The importance of timely and expert physiotherapy support was consistently  
29 emphasised as crucial to recovery. For example, one patient said *"our local social services  
30 immediately came around. My wheelchair was already here when I came home from hospital, but  
31 they immediately built a ramp, so I could get out of the house on my wheelchair (...) They were  
32 really good and I immediately started to feel so much better"*.

#### 39 Psychological Support: the psychological impact of trying to recover is probably as bad

41 The physical consequences of PBC were so pervasive they affected patients' identity, how  
42 they saw themselves and what they could expect from their body, a body with different abilities and  
43 restrictions: *"I've just learnt to be really patient and forgiving of myself. I suppose just coming to  
44 terms with the fact that my body and my mind have changed and that's part of it. It's not just being ill  
45 and having the treatment, it's everything that comes afterwards too"*. Patients dealt with the impact  
46 of PBC in different ways, for some professional support was needed.

51 Patients needed and accessed professional psychological support at different points in their  
52 timeline. For some it was while they were receiving treatment, for others it was a couple of months,  
53 sometimes years, after the end of treatment before they looked for professional help. The barriers to  
54 accessing support included not wanting to look weak or finding it difficult to admit that after  
55 treatment they were not feeling happy. Conversely, being advised by other patients to seek help  
56 was often a catalyst: *"Get counselling as quickly as you can, because it really does help (...)  
57 because the psychological impact of trying to recover is probably as bad, in a different way, as the  
58  
59  
60*

1  
2  
3 *physical side of treatment*". Having a good relationship with the General Practitioner (GP) also  
4 facilitated the process of telling a health professional they needed psychological support.  
5

6 Access to psychological support was not consistent across patient's experiences. A few  
7 patients described not feeling well and not discussing this with their clinical team. At least half of the  
8 patients described feeling low mood, anxiety, mild depression for a period of time before sharing  
9 this with professionals at primary or secondary care which then triggered signposting to support or  
10 receiving information about where they could access support (*"but they always ask how you're  
11 doing emotionally, as well. It was just at that point where I said, 'I'm actually not doing very well.'  
12 So, at the [hospital] they said, 'Pop along there,' and they've got details of, sort of, the surrounding  
13 areas, offices, etc., and they put us in touch with the local hospice in our area, who then helped  
14 us"*). The type of professional psychological support received varied from seeing a psychologist  
15 while in hospital, to referral by their GP (*"I'm on the waiting list for a mindfulness course, which my  
16 GP has referred me on"*), to receiving counselling over the phone or through visits at home. In a few  
17 cases, patients who had received psychological support as part of their hospital/primary care, felt  
18 they needed more support and had to look for support through charities. For teenagers and young  
19 adults who were treated in specialist centres for young people the support from youth support  
20 coordinators helped to facilitate interactions with other young people, which lessened the boredom  
21 and sadness of being in hospital. Psychological support was not needed by all patients and some  
22 relied on family and friends support or had their own coping mechanisms.  
23  
24  
25  
26  
27  
28  
29  
30  
31  
32  
33

## 34 **DISCUSSION**

35 The aim of this study was to explore the experiences of patients with PBC. These cancers  
36 are characterised by: commonly being associated with severe pain as a presenting symptom, more  
37 often affecting younger people; the need for very intensive and toxic chemotherapy regimens;  
38 surgical treatments which cause life-long morbidity; and unsatisfactory cure rates.  
39  
40  
41

42 While the altered body and level of impairment had a significant impact on patient's physical,  
43 emotional and social well-being, it was shown that support and expertise of professionals involved  
44 in patients' care, the perceived emotional and practical support received/available and patients own  
45 way of adapting to the changes caused by PBC influenced the recovery process. In addition,  
46 patients' experience was influenced by where they were in their disease trajectory (e.g. diagnosis,  
47 treatment, end of treatment, follow up, or recurrence) and their developmental stage in life (i.e. if the  
48 patient was a teenager, a young or older adult). The disease trajectory helped explain that there  
49 were certain points in their pathway that were particularly challenging for patients, such as the end  
50 of treatment when patients felt the support structures available during treatment were absent and  
51 they had more time to process what they had been through. Another important aspect was the  
52 stage where the patients were in their lives, if they were teenagers going through the challenges of  
53 school and establishing friendships or young adults establishing new romantic relationships,  
54  
55  
56  
57  
58  
59  
60

1  
2  
3 entering a new job or starting a family, or adults with children and mortgages, or older adults close  
4 to retirement or retired. These different challenges were intertwined with their experience of PBC  
5 and affected the support needed and how they managed their own experience. For example,  
6 impaired fertility was an issue for (young) adults, who reported not being able to have children as  
7 both a major loss and significant impediment to romantic relationships. Alongside these potential  
8 differences in experience, there were also commonalities as described below.

9  
10  
11  
12 The main findings showed that physical impairment had a significant impact on a patient's  
13 identity, with patients trying to get back to 'normal' or finding a 'new normal', which meant changing  
14 or adapting their daily activities, leisure time and school/work, this extended long after the initial  
15 treatment phase. This is in line with findings from other qualitative research<sup>21,28,14,22,24</sup>. In addition to  
16 the physical limitations following PBC treatment, self-perception and others perceptions of the  
17 altered body interfered with patient's body image, which had an impact on confidence in social  
18 interactions (e.g. not wanting to go out) and intimate relationships (e.g. feeling less attractive),  
19 findings which are consistent with previous research<sup>23,29,30</sup>. This study showed that emotional well-  
20 being changed along the different phases of PBC trajectory with the first and second years after  
21 diagnosis particularly physically and emotionally challenging for patients<sup>5</sup>. After the end of  
22 treatment, patients reported fear of recurrence and this was constantly brought to the forefront of  
23 their minds due to regular follow up appointments and scans (mainly patients within 5 years of  
24 diagnosis). These findings are contrary to Fauske's et al.<sup>23</sup> findings where the majority of the eight  
25 patients with osteosarcoma in the lower extremity (who were aged 18-50 and had been diagnosed  
26 for 3 to 10 years) who took part in the study did not report fear of recurrence. These contrasting  
27 results might be due to the focus of the interviews in Fauske's et al.<sup>23</sup> study – how has cancer  
28 changed your life and how it has changed you as a person – and our goal to cover patients  
29 experience from the point of diagnosis onwards.

30  
31  
32  
33 Moreover, patients in our study reported low mood, depression, anxiety and even suicidal  
34 ideation, with a few patients reporting more severe cases of depression or anxiety. This is  
35 consistent with previous research that has shown that although the majority of participants did  
36 report non-clinical anxious and depressive symptoms a significant minority did experience clinically  
37 relevant distress symptoms long after their treatment ended<sup>19</sup>. One last element in understanding  
38 patient's emotional well-being, shared by all, was the intensity and duration of chemotherapy and  
39 radiotherapy and how difficult it was for them physically and emotionally. Although exposure to  
40 intensive chemotherapy has been identified as adding to the risk for depression and somatic  
41 distress among both leukaemia and lymphoma survivors<sup>31</sup>, we do not know the impact/risk of  
42 treatments on patients with PBC. Conversely, there were also reports of positive growth in our  
43 study. This was, for some, more straightforward due to their personality and/or timely professional  
44 and informal support available. But this might also reflect Bekkering's et al.<sup>32</sup> suggestion that similar  
45 psychological status of patients with sarcoma and healthy peers found in their study was due to  
46  
47  
48  
49  
50  
51  
52  
53  
54  
55  
56  
57  
58  
59  
60

1  
2  
3 positive emotions felt after completion of treatment and survival, in what was termed the “response  
4 shift”.

5  
6 It was in the absence of certain elements of support that more negative experiences were  
7 revealed. It was shown that family and friends gave emotional and practical support, but those who  
8 did not have this support were at risk for worse emotional and social well-being. While the majority  
9 of patients in this study reported adapting to the changes in mobility, there were some who had  
10 either their mobility severely compromised or were physically constrained by side effects of  
11 treatment such as severe fatigue. These were also patients who were at higher risk for worse  
12 emotional and social well-being. Consistent with a review of survivorship after extremity sarcoma<sup>5</sup>,  
13 this study showed that physiotherapy and psychological support were crucial to the recovery  
14 process; however, neither was reliably provided at the most needed times for all patients.

15  
16 Our study had a number of limitations. A self-selected group of patients with a wide age  
17 range (13-77 years old) and at different points in their timeline (from newly diagnosed to patients  
18 who were more than 10 years from diagnosis) took part in the study. While this heterogeneity of the  
19 sample might be representative of the heterogeneity of this group of patients; some patients were  
20 reporting their experience of being newly diagnosed while others were reflecting on their experience  
21 of more than 10 years ago. It should be noted that patients described their experiences throughout  
22 the different phases and while newly diagnosed patients were able to give more detailed  
23 descriptions of that phase, this information was complemented by patients who had some  
24 perspective over their thoughts and feelings during that phase and what followed. Another limitation  
25 refers to the sample in terms of age, considering PBC peaks during adolescence/young adulthood,  
26 younger patients aged 13-24 years (current age) accounted for 15% of participants in this study.  
27 While saturation was reached on the issues raised by those who participated, a larger sample would  
28 have given us greater certainty that we could identify all the key issues across all the age groups.  
29 Nevertheless, this is a qualitative study and the aim was not generalisability, but the in-depth and  
30 credible analysis of patients' experiences of PBC across different age groups, gender, time from  
31 diagnosis, treatment types and anatomical sites. Moreover, our study makes an important  
32 contribution to the evidence, most notably the influencing factors of patient experiences across time.

33  
34 PBC has a negative impact on physical, emotional and social well-being. The extent of this  
35 impact might be felt long after treatment has ended or be specific to the end of treatment phase.  
36 Longitudinal studies are needed to better understand how patients recover, adapt and adjust to the  
37 changes imposed by diagnosis and treatment, their needs at different points in the timeline, and the  
38 impact of the support received. In addition, prospective studies, whether qualitative or quantitative,  
39 must include an exploration of changes in sexuality, fears of recurrence and impact on social and  
40 work activities, in order to underpin more holistic models of survivorship care. In clinical practice, the  
41 assessment of support in different phases of the disease trajectory is important for the identification  
42 of patients who may be at a higher risk for poor adjustment, and therefore, for targeting screening  
43  
44  
45  
46  
47  
48  
49  
50  
51  
52  
53  
54  
55  
56  
57  
58  
59  
60

1  
2  
3 measures and interventions to those patients most likely to benefit. Clinical interventions must take  
4 into consideration the timing and types of support provided. In particular for this population, it was  
5 shown again the need to ensure patients have access to physiotherapy and psychology services  
6 and the relevance of support to return to work or school/university. Lastly, as improvements in  
7 survival seem elusive at the moment then improving the experiences and quality of life for this  
8 patient group is paramount. While qualitative research has detailed the disruption and changes in  
9 patient's experiences as a consequence of PBC, quantitative research has not consistently shown  
10 the impact of PBC on patient's quality of life; hence research is needed to improve patient  
11 experience and quality of life measures.  
12  
13  
14  
15  
16

17 Patients with PBC experiences were influenced by the intensity of treatment and side effects  
18 that had an impact long after the treatment phase had ended. Mobility constraints, pain and fatigue  
19 influenced their participation in employment/education and leisure activities. The physical changes  
20 had also an impact on body image and their identity. Physical recovery was critical for their overall  
21 well-being and management of getting 'back to normal'. This study gave insight into factors which  
22 might influence adjustment over time, for better or for worse, showing that these affect patients at  
23 different life stages in which illness can disrupt important developmental milestones. These factors  
24 need to be taken into consideration to better understand and improve patients with PBC  
25 experiences.  
26  
27  
28  
29  
30  
31  
32  
33  
34  
35  
36  
37  
38  
39  
40  
41  
42  
43  
44  
45  
46  
47  
48  
49  
50  
51  
52  
53  
54  
55  
56  
57  
58  
59  
60

## REFERENCES

1. Gerrand C, Athanasou N, Brennan B, et al. UK Guidelines for the Management of Bone Sarcomas. *Clin Sarcoma Res* 2016;6(7):1-21.
2. National Cancer Intelligence Network (NCIN). Bone and Soft Tissue Sarcomas. UK Incidence and Survival 1996–2010 version 2.0. <http://www.ncin.org.uk/publications/reports/> (Accessed 25 Oct 2018).
3. Casali PG, Abecassis N, Bauer S, et al. on behalf of the ESMO Guidelines Committee, ERN PaedCan and ERN EURACAN. Bone sarcomas: ESMO–PaedCan–EURACAN: Clinical Practice Guidelines for diagnosis, treatment and follow-up. *Ann Oncol* 2018;29(Suppl 4):iv79–iv95.
4. Whelan JS, Jinks RC, McTiernan A, et al. Survival from high-grade localised extremity osteosarcoma: combined results and prognostic factors from three European Osteosarcoma Intergroup randomised trials. *Ann Oncol* 2012;23:1607–16.
5. Kwong TN, Furtado S, Gerrand C. What do we know about survivorship after treatment for extremity sarcoma? A systematic review. *Eur J Surg Oncol* 2014;40:1109-24
6. Ginsberg JP, Rai SN, Carlson CA, et al. A comparative analysis of functional outcomes in adolescents and young adults with lower-extremity bone sarcoma. *Pediatr Blood Cancer* 2007, 49:964-9.
7. Hinds PS, Billups CA, Cao X, et al. Health-related quality of life in adolescents at the time of diagnosis with osteosarcoma or acute myeloid leukemia. *Eur J Onc Nurs* 2009;13:156-63.
8. Department of Health. National Cancer Patient Experience Survey 2017: National Report. <http://www.ncpes.co.uk/reports/2017-reports/national-reports-2/3579-cpes-2017-national-report/file;> (Accessed 25 Oct 2018).
9. Eiser C, Darlington AE, Stride CB, et al. Quality of life implications as a consequence of surgery: limb salvage, primary and secondary amputation. *Sarcoma* 2001;5:189-95.
10. Hopyan S, Tan JW, Graham HK, et al. Function and upright time following limb salvage, amputation, and rotationplasty for pediatric sarcoma of bone. *J Pediatr Orthop* 2006;26:405-8.
11. Akahane T, Shimizu T, Isobe K, et al. Evaluation of postoperative general quality of life for patients with osteosarcoma around the knee joint. *J Pediatric Orthop, Part B* 2007;16:269-72.
12. Expósito Tirado JA, Márquez Vegab C, Muro Guerraa C, et al. Calidad de vida y funcionalidad en pacientes pediátricos intervenidos de tumores óseos en miembros inferiores: Cirugía reconstructiva versus amputación. *Rehabilitación* 2011;45:313-9.
13. Barrera M, Teall T, Barr R, et al. Health related quality of life in adolescent and young adult survivors of lower extremity bone tumors. *Pediatr Blood Cancer* 2012;58:265-73.
14. Davidge K, Bell R, Ferguson P, et al. Patient expectations for surgical outcome in extremity soft tissue sarcoma. *J Surg Oncol* 2009;100:375-81.
15. Felder-Puig R, Formann AK, Mildner A, et al. Quality of life and psychosocial adjustment of young patients after treatment of bone cancer. *Cancer* 1998;83:69-75.
16. Barrera M, Teall T, Barr R, et al. Sexual function in adolescent and young adult survivors of lower extremity bone tumors. *Pediatr Blood Cancer* 2010;55:1370-6.
17. Singh R, Ripley D, Pentland B, et al. Depression and anxiety symptoms after lower limb amputation: the rise and fall. *Clin Rehabil* 2009;23:281–286.
18. Koopman HM, Koetsier JA, Taminiu AHM, et al. Health-related quality of life and coping strategies of children after treatment of a malignant bone tumor: a 5-year follow-up study. *Pediatr Blood Cancer* 2005;45:694-9.

- 1  
2  
3 19. Paredes T, Pereira M, Simões MR, Canavarro MC. A longitudinal study on emotional  
4 adjustment of sarcoma patients: the determinant role of demographic, clinical and coping variables.  
5 *Eur J Cancer Care* 2012;21:41–51.  
6
- 7 20. Tang MH, Castle DJ, Choong PFM. Identifying the Prevalence, Trajectory, and Determinants of  
8 Psychological Distress in Extremity Sarcoma. *Sarcoma* 2015; 2015:745163.  
9
- 10 21. Parsons JA, Eakin JM, Bell RS, Franche R-L, Davis AM. So, are you back to work yet?' Re-  
11 conceptualizing 'work' and 'return to work' in the context of primary bone cancer. *Soc Sci Med*  
12 2008;67(11):1826–1836.  
13
- 14 22. Brown A, Parsons JA, Martino C, et al. Work status after distal femoral kotz reconstruction for  
15 malignant tumors of bone. *Arch Phys Med Rehabil* 2003;84(1):62-68.  
16
- 17 23. Fauske L, Bondevik H, Bruland OS, Ozakinci G. Negative and Positive Consequences of  
18 Cancer Treatment Experienced by Long-term Osteosarcoma Survivors: A Qualitative Study.  
19 *Anticancer Res* 2015;35:6081-90.  
20
- 21 24. Fauske L, Bruland OS, Grov EK, Bondevik H. Cured of Primary Bone Cancer, But at What Cost:  
22 A Qualitative Study of Functional Impairment and Lost Opportunities. *Sarcoma* 2015;2015:484196.  
23
- 24 25. Fauske L, Lorem G, Grov EK, Bondevik H. Changes in the Body Image of Bone Sarcoma  
25 Survivors Following Surgical Treatment—A Qualitative Study. *J Surg Oncol* 2016;113:229–234.  
26
- 27 26. Bredart A, Marrel A, Abetz-Webb L, Lasch K, Acquadro C. Interviewing to develop patient-  
28 reported outcome (PRO) measures for clinical research: eliciting patients' experience. *Health Qual*  
29 *Life Outcomes* 2014;12:15.  
30
- 31 27. Taylor RM, Gibson F, Franck LS. A concept analysis of health-related quality of life in young  
32 people with chronic illness. *J Clin Nurs* 2008;17(14):1823-1833.  
33
- 34 28. Earle EA, Eiser C, Grimer R. He never liked sport anyway'-Mother's views of young people  
35 coping with a bone tumour in the lower limb. *Sarcoma* 2005;9(1-2):7–13.  
36
- 37 29. Lehmann V, Gronqvist H, Engvall G, et al. Negative and positive consequences of adolescent  
38 cancer 10 years after diagnosis: an interview-based longitudinal study in Sweden. *Psychooncology*  
39 2014;23(11):1229-1235.  
40
- 41 30. Rasmussen DM, Hansen HP, Elverdam B. How cancer survivors experience their changed body  
42 encountering others. *Eur J Oncol Nurs* 2010;14(2):154-159.  
43
- 44 31. Zebrack BJ, Zeltzer LK, Mertens AC, Odom L, Berkow R, Robisom LL. Psychological outcomes  
45 in long-term survivors of childhood leukemia, Hodgkin's disease, and non-Hodgkin's lymphoma: a  
46 report from the Childhood Cancer Survivor Study. *Pediatrics* 2002;110(1 Pt 1):42-52.  
47
- 48 32. Bekkering WP, van Egmond-van Dam JC, Bramer JAM, Beishuizen A, Fiocco M, Dijkstra PDS.  
49 Quality of life after bone sarcoma surgery around the knee: A long-term follow-up study. *Eur J*  
50 *Cancer Care*. 2017;26(4):1-9.  
51  
52  
53  
54  
55  
56  
57  
58  
59  
60



## Appendix 1 - Interview schedule

|                                                                      |                                                                                                                                                                                                                                                                                                                                                                                                                                                                                                                                                                                                                                                                                                                                                                                                                                                                                                |
|----------------------------------------------------------------------|------------------------------------------------------------------------------------------------------------------------------------------------------------------------------------------------------------------------------------------------------------------------------------------------------------------------------------------------------------------------------------------------------------------------------------------------------------------------------------------------------------------------------------------------------------------------------------------------------------------------------------------------------------------------------------------------------------------------------------------------------------------------------------------------------------------------------------------------------------------------------------------------|
| Welcome and introduction; Study aim; Participation & confidentiality | <p>Thank you for agreeing to take part in this study. I want to remind you that what we talk about will be kept confidential. Nothing you say will be shared with your healthcare team. Only a report summary of the interviews will be given out. Your name will not be on the written record of your interview and the audio recording will be destroyed when the study is complete. Can I check that you are still happy to take part and for me to record the interview? If at any time you want to stop talking just let me know and I will stop.</p> <p>The reason I want to talk to you is to find out what it is like being diagnosed, treated and living with a sarcoma diagnosis. There may be things that have been challenging but also things that have been okay. I want to know about the things that are most important to you. Do you have any questions before we start?</p> |
| Diagnosis, treatment timeline and experiences                        | <p>Do you want to tell me about the time you found out you had sarcoma?</p> <ul style="list-style-type: none"> <li>• <i>What type of sarcoma do you have [location]?</i></li> <li>• <i>What was your treatment(s) experience?</i></li> <li>• <i>What was your care experience [place of care and delivery of care]?</i></li> <li>• <i>Where are you now in the journey [treatment end, relapse etc.]?</i></li> <li>• <i>If treatment ended, how long ago?</i></li> </ul>                                                                                                                                                                                                                                                                                                                                                                                                                       |
| Physical health                                                      | <p>How satisfied are you with your health? (If not, then explore why not)</p> <p>How important is was physical health to you?</p> <p>How do you ensure you are living a healthy life?</p> <p>Is your physical health impaired due to their sarcoma [amputation, general weakness, pain, fatigue]?</p> <ul style="list-style-type: none"> <li>• <i>Do you need anyone to help you with activities of daily living (washing, dressing, going to the toilet)?</i></li> <li>• <i>Establish this is due to sarcoma and not present pre-diagnosis</i></li> <li>• <i>How do you feel about this?</i></li> <li>• <i>Do you have any late-effects (if some time out of treatment) – impact on general well-being</i></li> </ul>                                                                                                                                                                         |
| Emotional health                                                     | <p>How have you been feeling in the last 3 months?</p> <ul style="list-style-type: none"> <li>• <i>Do you feel sad [prompts – feel low, anxious, depressed]? How often?</i></li> <li>• <i>If they do, explore what triggers this, what they do about it, how often it happens</i></li> <li>• <i>Have they been able to access any professional help (if they wanted it and ease of accessing it)</i></li> </ul> <p>How do you feel about your body image and appearance?</p>                                                                                                                                                                                                                                                                                                                                                                                                                   |
| Social well-being                                                    | <p>Are you employed/in education? (Explore how this has been since diagnosis)</p> <ul style="list-style-type: none"> <li>• Have there been any challenges?</li> <li>• Have new opportunities been available that weren't pre-diagnosis?</li> </ul> <p>How has your relationship with other people been since your diagnosis?</p> <ul style="list-style-type: none"> <li>• <i>Explore impact on family, friends and changes in relationships.</i></li> <li>• <i>For patients over 16, explore sexual identify/sex life</i></li> </ul> <p>How has your diagnosis affected your financial well-being?</p> <p>Do you have opportunities for leisure activities?</p>                                                                                                                                                                                                                                |
| Final comments and wrap up                                           | <p>Any other information you feel is important for me to know, but that I didn't ask about?</p> <p>Thank you for sharing your experiences with us.</p>                                                                                                                                                                                                                                                                                                                                                                                                                                                                                                                                                                                                                                                                                                                                         |

## COREQ

### Domain 1: Research team and reflexivity

#### Personal Characteristics

1. Interviewer/facilitator - Page 6
2. Credentials – Page 1
3. Occupation – Page 1
4. Gender – Page 6/Page 1
5. Experience and training - Page 1/Page 6

#### Relationship with participants

6. Relationship established - Page 6
7. Participant knowledge of the interviewer - Page 6
8. Interviewer characteristics – X

### Domain 2: study design

#### Theoretical framework

9. Methodological orientation and Theory - Page 6

#### Participant selection

10. Sampling – Page 8
11. Method of approach - Page 6
12. Sample size – Page 7
13. Non-participation – X

#### Setting

14. Setting of data collection- Page 6
15. Presence of non-participants - Page 6
16. Description of sample - Page 7

#### Data collection

17. Interview guide – Appendix 1

1  
2  
3 18. Repeat interviews – Page 6  
4

5 19. Audio/visual recording - Page 6  
6

7 20. Field notes - Page 6  
8

9 21. Duration - Page 6  
10

11 22. Data saturation – Page 19  
12

13 23. Transcripts returned - X  
14

15  
16 **Domain 3: analysis and findings**  
17

18 Data analysis  
19

20 24. Number of data coders - Page 6  
21

22 25. Description of the coding tree - Page 6  
23

24 26. Derivation of themes - Page 6, 7 and 8  
25

26 27. Software - Page 6  
27

28 28. Participant checking – X  
29

30 Reporting  
31

32 29. Quotations presented – Page 8 to 17  
33

34 30. Data and findings consistent – Page 8 to 17  
35

36 31. Clarity of major themes – Page 8 to 17  
37

38 32. Clarity of minor themes – Page 8 to 17  
39  
40  
41  
42  
43  
44  
45  
46  
47  
48  
49  
50  
51  
52  
53  
54  
55  
56  
57  
58  
59  
60

# BMJ Open

## A qualitative study exploring patients experiences of being diagnosed and living with primary bone cancer in the UK

|                                 |                                                                                                                                                                                                                                                                                                                                                                                                                                                                                                                                                                                                                                                                                                                                                                                                                                                                                   |
|---------------------------------|-----------------------------------------------------------------------------------------------------------------------------------------------------------------------------------------------------------------------------------------------------------------------------------------------------------------------------------------------------------------------------------------------------------------------------------------------------------------------------------------------------------------------------------------------------------------------------------------------------------------------------------------------------------------------------------------------------------------------------------------------------------------------------------------------------------------------------------------------------------------------------------|
| Journal:                        | <i>BMJ Open</i>                                                                                                                                                                                                                                                                                                                                                                                                                                                                                                                                                                                                                                                                                                                                                                                                                                                                   |
| Manuscript ID                   | bmjopen-2018-028693.R1                                                                                                                                                                                                                                                                                                                                                                                                                                                                                                                                                                                                                                                                                                                                                                                                                                                            |
| Article Type:                   | Original research                                                                                                                                                                                                                                                                                                                                                                                                                                                                                                                                                                                                                                                                                                                                                                                                                                                                 |
| Date Submitted by the Author:   | 12-Aug-2019                                                                                                                                                                                                                                                                                                                                                                                                                                                                                                                                                                                                                                                                                                                                                                                                                                                                       |
| Complete List of Authors:       | Martins, Ana; University College London Hospitals NHS Foundation Trust, Cancer Clinical Trials Unit<br>Whelan, Jeremy; University College London Hospitals NHS Foundation Trust,<br>Bennister, Lindsey ; University College London Hospitals NHS Foundation Trust<br>Fern, Lorna; University College London Hospitals NHS Foundation Trust, Oncology<br>Gerrand, Craig; Royal National Orthopaedic Hospital Stanmore<br>Onasanya, Maria; University College London Hospitals NHS Foundation Trust<br>Storey, Lesley; Queen's University Belfast Faculty of Arts Humanities and Social Sciences<br>Wells, Mary; Imperial College Healthcare NHS Trust<br>Windsor, Rachael; University College London Hospitals NHS Foundation Trust<br>Woodford, Julie ; Royal National Orthopaedic Hospital Stanmore<br>Taylor, Rachel; University College London Hospitals NHS Foundation Trust; |
| <b>Primary Subject Heading</b>: | Qualitative research                                                                                                                                                                                                                                                                                                                                                                                                                                                                                                                                                                                                                                                                                                                                                                                                                                                              |
| Secondary Subject Heading:      | Oncology                                                                                                                                                                                                                                                                                                                                                                                                                                                                                                                                                                                                                                                                                                                                                                                                                                                                          |
| Keywords:                       | patient experience, primary bone cancer, quality of life                                                                                                                                                                                                                                                                                                                                                                                                                                                                                                                                                                                                                                                                                                                                                                                                                          |
|                                 |                                                                                                                                                                                                                                                                                                                                                                                                                                                                                                                                                                                                                                                                                                                                                                                                                                                                                   |

SCHOLARONE™  
Manuscripts

1  
2  
3 **A qualitative study exploring patients experiences of being diagnosed and living with**  
4 **primary bone cancer in the UK**  
5  
6

7 Ana Martins, Jeremy S Whelan, Lindsey Bennister, Lorna A Fern, Craig Gerrand, Maria Onasanya,  
8 Lesley Storey, Mary Wells, Rachael Windsor, Julie Woodford, Rachel M Taylor  
9

10 Correspondence to:

11 Dr Ana Martins

12 UCLH Cancer Clinical Trials Unit, 1st Floor East, 250 Euston Road, London. NW1 2PG

13 Telephone number: 02034478831

14 Email: [ana.martins1@nhs.net](mailto:ana.martins1@nhs.net)  
15  
16

17  
18 Ana Martins, Research Associate, Cancer Division, University College London Hospitals NHS  
19 Foundation Trust, London NW1 2PG  
20

21 Jeremy S Whelan, Professor of Cancer Medicine, Cancer Division, University College London  
22 Hospitals NHS Foundation Trust, London NW1 2PG  
23

24 Lindsey Bennister, WMUK - Waldenstrom's Macroglobulinaemia UK, London E4 6EE, United  
25 Kingdom  
26

27 Lorna A Fern, Teenage and Young Adult Researcher and Patient/Public Involvement Lead, National  
28 Cancer Research Institute Teenage, Young Adult and Germ Cell Clinical Studies Group, Cancer  
29 Division, University College London Hospitals NHS Foundation Trust, London NW1 2PG  
30

31 Maria Onasanya, Patient representative, University College London Hospitals NHS Foundation  
32 Trust, London NW1 2PG  
33

34 Craig Gerrand, Consultant Orthopaedic Surgeon, London Sarcoma Service, Royal National  
35 Orthopaedic Hospital, Stanmore, Middlesex HA7 4LP  
36

37 Lesley Story, Department of Psychology, Birmingham City University, Birmingham, B4 7BD, United  
38 Kingdom  
39

40 Mary Wells, Nursing Directorate, Imperial College Healthcare NHS Trust, Charing Cross Hospital,  
41 London, W6 8RF, United Kingdom  
42  
43

44 Rachael Windsor, Consultant Paediatric and Adolescent Oncologist, Children and Young People's  
45 Cancer Service, University College London Hospitals NHS Foundation Trust, London NW1 2PG  
46

47 Julie Woodford, Sarcoma Unit, Royal National Orthopaedic Hospital NHS Trust, Stanmore,  
48 Middlesex, HA7 4LP, United Kingdom  
49

50 Rachel M Taylor, Director of the CNMAR, University College London Hospitals NHS Foundation  
51 Trust, London NW1 2PG  
52  
53

54 Word count: 5369  
55  
56  
57  
58  
59  
60

## ABSTRACT

**Objective:** The aim of this study is to explore the experiences of patients with primary bone cancer.

**Design:** Qualitative study design using semi-structured interviews and focus groups.

**Setting:** Hospitals across the United Kingdom (UK) and recruitment through UK sarcoma charities and support groups.

**Methods:** Semi-structured telephone/face-to-face interviews and focus groups with a purposive sample of 26 participants. Data were analysed using Framework Analysis.

**Participants:** Patients (n=26) with primary bone cancer aged 13-77 years. The majority were male (69%), white (85%); diagnosed within 4 years (54%); and had lower limb sarcoma (65%). Ten participants had undergone an upper/lower limb amputation (39%).

**Results:** The health-related quality of life domains of physical, emotional and social well-being and healthcare professionals' role were the overarching themes of analysis. The physical domain anchored patient experiences. The intensity and length of treatment, the severity of side-effects, the level of disability after surgery and the uncertainty of their prognosis had an impact on patient's self-image, confidence, mood and identity, and caused disruption to various aspects of the patients' social life, including their relationships (emotional and sexual) and participation in work/school and leisure activities. Adaptation was influenced by the way patients dealt with stress and adversity, with some finding a new outlook in life, and others struggling with finding their 'new normal'. Family and friends were the main source of support. Healthcare professional's expertise and support was critical. Rehabilitation services had a considerable role in patient's physical and emotional well-being, but inequitable access to these services was apparent.

**Conclusions:** This study described the impact of primary bone cancer on patients' well-being and adjustment over time with the identification of influencing factors of better/worse experiences. It showed impact was felt after end of treatment and affected patients at different life stages. Holistic models of survivorship care are needed.

Strengths and limitations of this study

- This study is an in-depth exploration of the experiences of 26 patients with primary bone cancer
- The study population varied considerably by age at, and time from, diagnosis, gender and anatomical location
- This study includes the experience of patients who had undergone amputation and other surgical interventions and treatment types
- Self-selected participants might not be representative of the experiences of patients with bone sarcoma, but our findings are consistent with previous studies and add to the research by identifying the role of influencing factors of better/worse experiences

**Keywords:** patient experience; primary bone cancer; quality of life

**A funding statement:**

This work was supported by Sarcoma UK (grant number SUK102.2016LG) and Bone Cancer Research Trust (grant number BCRT/49/16). RMT is funded by the National Institute for Health Research; LAF is funded by Teenage Cancer Trust. None of the funders were involved in conducting this review or drafting this manuscript. MW acknowledges support from the Imperial Biomedical Research Centre (BRC). JSW/RMT acknowledge support from University College London Hospitals BRC. The views are of the authors and do not necessarily reflect those of Sarcoma UK or Bone Cancer Research Trust, the NIHR/NHS or Teenage Cancer Trust.

**A competing interest statement:**

None declared

**Acknowledgements:**

We would like to thank all the Principal Investigators at the Trusts opened for recruitment - Dr Fiona Cowie; Dr Helen Hatcher; Mr Amit Kumar; Dr Dan Stark; Mr Craig Gerrand; Mr Robert Ashford; Ms Claire McKenzie; Ms Sarah Massey; Ms Julie Woodford; Mr Jonathan Gregory; Dr Robin Young; Dr Mariam Jafri; Dr Paula Wilson; Mr Robert Ashford; Dr Nicola Keay; Mr Paul Cool. We would also want to thank all the professionals involved in patient recruitment.

**Author contributions:**

RMT, LAF, MW, LS, RW, JW, CG and JSW were involved in developing the protocol; AM coordinated the running of the study and was responsible for data acquisition; RMT, LAF, MW, LS, RW, JW, CG, JSW, LB and MO contributed to the analysis; AM, CG and MW drafted the manuscript. All authors critically revised and approved the final manuscript.

**Ethics Approval:**

The Study was approved by the London Stanmore NHS Research Ethics Committee (reference: 16/LO/2152).

**Data Availability:**

No additional data available.

## INTRODUCTION

Primary bone cancer (PBC), also referred to as a bone sarcoma, is very rare and makes up approximately 0.2% of all cancers diagnosed in the United Kingdom (UK).<sup>1</sup> In 2015, 551 new patients were diagnosed with PBC in the UK.<sup>2</sup> The commonest subtypes are osteosarcoma and Ewing sarcoma, which have a relatively high incidence in children and young people, and chondrosarcomas, more common in older age groups.<sup>3</sup> There has been no major improvement in 5-year overall survival rates for patients with PBC over the past 25–30 years, with rates static at between 53 and 55%.<sup>4</sup>

To give the potential for cure, PBC requires complete surgical resection of the affected part of the bone. Thus, the patient characteristically experiences a lifelong limitation in physical activity. Less frequently, this can be achieved only by limb amputation, which leads to permanent disability. Given the high physical burden of the disease and its treatment and expectations of survival, poorer patient-reported outcomes<sup>5,6</sup> are recorded in comparison to patients with other cancer types.<sup>7</sup> For example, patients have reported poorer care experiences compared with other cancer types in the National Cancer Patient Experience Survey (NCPES).<sup>8</sup>

When conducting a literature search, it became evident that there were inconsistent findings regarding the impact PBC may have on patients.<sup>5</sup> While research has shown that patients may experience lower levels of physical functioning than population norms or control groups (e.g. other cancer groups or healthy peers), there appears to be a lack of reliable information on the impact on patient's emotional and social well-being.<sup>5</sup> Several studies comparing patients who undergo an amputation or limb sparing surgery have shown no differences in quality of life scores<sup>9,10,11,6,12,13</sup>; however there are also reports of patients who had an amputation having poorer health-quality of life scores compared with patients who had other types of surgery<sup>14</sup>. The inconsistent results are also shown in studies that report that patients who had amputations had poorer mental health<sup>15,16</sup> but better feelings of self-worth<sup>16</sup> compared with patients who had other type of surgery. Other studies have shown that those who undergo lower limb amputation tended to report more anxiety and depression.<sup>5,17</sup>

In addition to studies comparing patients who undergo an amputation and other types of surgery, there are studies comparing emotional and social well-being of patients with PBC with reference values either of general population data provided with the measure, non-cancer control data collected as part of the study or from patients with other cancer types. Overall the findings reported are also inconsistent.<sup>5</sup> Research with children and young people has shown improvement in emotional functioning over time<sup>7,18</sup>, however in studies with older patients Paredes et al.<sup>19</sup> found no improvement in cognitive and emotional well-being from diagnosis to treatment and noted that they were worse than reference norms. No clear pattern can sufficiently explain these inconsistencies, although methodological differences including range of assessment tools used,



1  
2  
3 outcome variables measured, as well as diagnosis, anatomical location, treatment, and age groups  
4 have to be taken into consideration.<sup>5</sup>  
5

6 Given the complexity and heterogeneity within the patient population<sup>5,20</sup> more research is  
7 needed to explore patients' experiences of PBC. The few qualitative studies conducted have shown  
8 the adverse impact of having PBC on patient's emotional and social well-being; however these  
9 studies focused on specific time points or specific aspects of the patient experience such as  
10 employment<sup>21, 22</sup>, and the long-term effects of bone cancer on current daily life, body image, future  
11 possibilities and identity<sup>23,24,25</sup>.  
12  
13

14 Both qualitative and quantitative studies shed light on the impact of PBC on patients' quality  
15 of life; however more research is needed to understand in-depth, how patients of different ages,  
16 genders and treatment experiences live with and beyond PBC.<sup>5</sup> Qualitative research provides  
17 richness, depth, nuance, context, multi-dimensionality and complexity of patients' lived experiences  
18 and is thus well suited to explore these patients' experiences<sup>26</sup>. The aim of the current study was to  
19 explore the experiences of patients with PBC across the UK.  
20  
21  
22  
23  
24  
25

## 26 **METHODS**

### 27 **Design**

28 This was a qualitative study involving patients with PBC, conducted as part of a larger  
29 qualitative study to develop a sarcoma patient-reported outcome measure – the Sarcoma  
30 Assessment Measure (SAM).  
31  
32  
33

### 34 **Patient Involvement**

35 The Sarcoma Assessment Measure is about patient experience of being diagnosed and  
36 living with sarcoma, thus patient involvement is a central part of the study. Initially, the SAM  
37 research team included the Chief Executive of Sarcoma UK (Lindsey Bennister), who represented  
38 the patient perspective in the design of the study. Lindsey Bennister will continue to be involved in  
39 the study as a patient representative. Maria Onasanya, who was diagnosed with sarcoma over 5  
40 years ago joined the study as a co-investigator and has assisted with data analysis. Both Lindsey  
41 and Maria have assisted with data analysis and are co-authors in presentations and research  
42 papers. We are also working alongside Sarcoma UK and the Bone Cancer Research Trust to  
43 ensure patients are updated about the progress of the study (through study newsletters suitable for  
44 non-specialist audience) and they receive copies of all relevant outputs. Healthcare professionals  
45 working with patients with sarcoma have been engaged in data discussion, recruitment strategies  
46 and dissemination.  
47  
48  
49  
50  
51  
52  
53  
54  
55

### 56 **Participants and setting**

57  
58  
59  
60

1  
2  
3 The study was undertaken across the UK recruiting through specialist PBC clinical teams,  
4 sarcoma charities and patient support groups. Eligible patients were those with any diagnosis of  
5 bone sarcoma, aged over 13 (current age) and were able to communicate in English.  
6  
7

8 Patients were identified by recruiting hospitals who obtained and emailed the patient's  
9 written consent to the researcher, the researcher reaffirmed consent prior to conducting the  
10 interview. Patients less than 16 years gave their assent after consent had been received from their  
11 legal guardians.  
12  
13

14 Patients who contacted the research team after seeing information on social media from  
15 sarcoma charities were given information about the study and sent a consent form; the interviews  
16 proceeded following receipt of consent. Focus groups conducted in patient support groups were  
17 only conducted if all members consented to participate; information was given to members by the  
18 lead for the support group (either another patient or a clinical nurse specialist) and the research  
19 team were invited to the group if patients had given their consent. The study was approved by  
20 London - Stanmore Research Ethics Committee (IRAS reference: 217605).  
21  
22  
23  
24  
25  
26

### 27 **Data collection**

28 Data were collected through semi-structured individual telephone interview (conducted by  
29 AM) and focus groups (led by AM and RT) conducted in sarcoma support group meetings (AM and  
30 RT are experienced researchers and were not involved in the patient's care). Young people less  
31 than 16 years took part in face-to-face interviews (parents were present during the interview). The  
32 interview schedule was developed from the literature<sup>27</sup> and expert opinion (patients and healthcare  
33 professionals) and included questions about diagnosis, treatment timeline and experiences;  
34 physical and emotional health; and social well-being. This was not prescriptive and was purposefully  
35 flexible to enable the researcher to explore new and emerging experiences<sup>28</sup>. This topic guide was  
36 shared with participants prior to the interview (Appendix 1), so they knew the topics covered (this  
37 allowed participants to decide whether they wanted to talk about the topics covered and gave them  
38 more control over the process). With permission, all interviews and focus groups were recorded and  
39 transcribed verbatim. Interviews lasted between 26 and 96 minutes and focus groups lasted 2  
40 hours. Field notes were taken during and after the focus groups.  
41  
42  
43  
44  
45  
46  
47  
48  
49

### 50 **Data analysis**

51 Data analysis was developed in two phases. Transcripts were broadly coded into the three  
52 functional domains of quality of life defined by Taylor et al.<sup>29</sup> "subjective, multidimensional and  
53 dynamic (...) and includes aspects of physical, psychological and social function" (p1831). A  
54 preliminary framework was developed by AM including these three overarching domains which then  
55 evolved during analysis of the initial transcripts. Data were analysed line-by-line with the aid of QSR  
56 NVivo 11, a specialist software package used to assist with data storage, management and  
57  
58  
59  
60

retrieval. The coded data were entered into a framework that included the overarching themes of quality of life and the themes that emerged from the data (the fourth overarching theme – healthcare professional's role emerge from the data). Within each overarching domain, data were coded into more detailed themes using in NVivo codes. For example, for the overarching theme of emotional well-being, a subtheme of coping mechanisms was identified. Data exploration of patients' experiences considering age, gender, or if the patient had an amputation, helped uncover commonalities and differences. Initial coding was reviewed by the research team and revised following discussion.

## RESULTS

Overall, a purposive sample of 34 of 121 patients participating in the wider Sarcoma Assessment Measure (SAM) study were diagnosed with PBC; 8 patients had craniofacial bone sarcomas and were not included in this analysis as they presented with experiences more akin to those with soft tissue head and neck sarcoma (data available from the overall study which includes patients with soft tissue sarcoma). We report here the findings from the remaining 26 participants (Table 1).

**Table 1.** Participants' characteristics

|                                          |                                                   | N  | %  |
|------------------------------------------|---------------------------------------------------|----|----|
| <b>Gender</b>                            | Male                                              | 18 | 69 |
|                                          | Female                                            | 8  | 31 |
| <b>Age at study</b>                      | M=40.5; SD=17.9, range 13-77 years                |    |    |
|                                          | 13-24                                             | 4  | 15 |
|                                          | 25-39                                             | 11 | 42 |
|                                          | 40-65                                             | 6  | 23 |
|                                          | 66+                                               | 5  | 19 |
| <b>Age at diagnosis</b>                  | M=34.2; SD=18.1, range 8-77 years                 |    |    |
|                                          | 8-24                                              | 6  | 23 |
|                                          | 25-39                                             | 14 | 54 |
|                                          | 40-66+                                            | 6  | 23 |
| <b>Marital status</b>                    | Married/civil partnership/cohabiting              | 13 | 50 |
|                                          | Single                                            | 9  | 35 |
|                                          | Other                                             | 4  | 15 |
| <b>Employment</b>                        | Employee full-time/part-time job                  | 10 | 38 |
|                                          | Full-time education at school, college/university | 5  | 19 |
|                                          | Wholly retired from work                          | 5  | 19 |
|                                          | Other                                             | 6  | 23 |
| <b>Ethnicity</b>                         | White British/any other white background          | 22 | 85 |
|                                          | Other                                             | 4  | 15 |
| <b>Time from diagnosis</b>               | 0-4 (years)                                       | 14 | 54 |
|                                          | 5-20+ (years)                                     | 12 | 46 |
| <b>Treatment status</b>                  | On treatment                                      | 5  | 19 |
|                                          | Off treatment                                     | 21 | 81 |
| <b>Where in the body was the sarcoma</b> | Lower limb +/- other site                         | 19 | 73 |
|                                          | Upper limb +/- other site                         | 5  | 19 |

|                       |                                        |    |    |
|-----------------------|----------------------------------------|----|----|
|                       | Spine +/- other site                   | 2  | 8  |
| <b>Treatment Type</b> | Surgery alone                          | 8  | 31 |
|                       | Surgery and chemotherapy               | 12 | 46 |
|                       | Surgery, radiotherapy and chemotherapy | 4  | 15 |
|                       | Surgery and radiotherapy               | 1  | 4  |
|                       | Chemotherapy and radiotherapy          | 1  | 4  |
| <b>Amputation</b>     | Yes                                    | 10 | 39 |
|                       | No                                     | 16 | 61 |

Four overarching themes structured the analysis: the health-related quality of life domains of physical, emotional and social well-being and the role of healthcare professionals. More detailed analysis revealed that the experience of sarcoma in relation to the quality of life domains was particularly influenced by the patient's stage in life (i.e. if they were a teenager, young or older adult), the individual's coping strategies and social support, the nature and extent of adaptation that had to be made as a result of illness (referred to as the adaptive tasks of illness), and where they were in their disease trajectory (e.g. diagnosis, treatment, end of treatment, follow up, or recurrence). These will be described throughout the presentation of results below.

**Physical Well-being:** *it was literally the worst pain I'd ever experienced*

The physical domain anchored patient experiences and the impact of PBC on emotional and social well-being. The intensity of treatment (surgery, cycles of chemotherapy and/or radiotherapy), the severity of side-effects, the length of treatment or the level of disability after surgery were some of the key features of PBC influencing the experiences described by patients. Patients faced specific challenges at different points in their treatment pathway and these are presented in Table 2.

The extensive surgery required had a profound impact on mobility, with lessened strength, instability, loss of flexibility, and poor balance. Patients described use of technical aids to their mobility such as crutches or a cane, use of a wheelchair or mobility scooter. Functional impairment caused major disruption in every aspect of the patients' life such as climbing stairs, lifting, driving, walking: *"going up and down the stairs is a job of work, to be honest. It is quite tiring"*. Most patients described the frustration of not being able to be as active as before and this was felt long after end of treatment.

After lower limb amputation, as well as mobility being severely affected, patients needed to re-learn activities of daily living, including going to the toilet, taking a shower and walking. A well-fitted prosthesis was crucial to successfully gain greater mobility. If this was achieved this positively influenced their overall well-being; however, patients described having issues with their prosthesis which had a negative impact on their lives.

Given the impact on mobility and other everyday tasks, physiotherapy played a major role in the recovery process. It helped patients to become mobile and manage the long-term effects of surgery: *"I found that when we stopped, I got lazy with walking which would then give me more*

1  
2  
3  
4  
5  
6  
7  
8  
9  
10  
11  
12  
13  
14  
15  
16  
17  
18  
19  
20  
21  
22  
23  
24  
25  
26  
27  
28  
29  
30  
31  
32  
33  
34  
35  
36  
37  
38  
39  
40  
41  
42  
43  
44  
45  
46  
47  
48  
49  
50  
51  
52  
53  
54  
55  
56  
57  
58  
59  
60

*problems with the back and the ribs and the side so I find that I have to go and see a physio every six weeks”.*

For peer review only

**Table 2.** PBC impact on physical well-being at different points in the treatment pathway

| Time Point                            | Impact on physical well-being                                                                                                                                                                                                                                                                                                                                                                                                                             |
|---------------------------------------|-----------------------------------------------------------------------------------------------------------------------------------------------------------------------------------------------------------------------------------------------------------------------------------------------------------------------------------------------------------------------------------------------------------------------------------------------------------|
| <b>At diagnosis</b>                   | Onset of pain as the trigger to seek help for many patients                                                                                                                                                                                                                                                                                                                                                                                               |
| <b>During treatment</b>               |                                                                                                                                                                                                                                                                                                                                                                                                                                                           |
| • Radiotherapy                        | Fatigue and burning sensations as negative side-effects of treatment                                                                                                                                                                                                                                                                                                                                                                                      |
| • Chemotherapy                        | The majority of patients gave vivid descriptions of how debilitating their treatment was and some experienced frequent hospitalisations between chemotherapy cycles<br>Debilitating physical effects and frequent hospitalisations                                                                                                                                                                                                                        |
| • Side-effects                        | Mouth ulcers, nausea, fatigue, (chest) infections, constipation, incontinence, diarrhoea, sepsis, tinnitus, hearing loss, anaemia, <i>“pins and needles in the ends of my fingers and the loss of some feeling in the ends of my fingers”</i> , kidney and heart problems, and foot drop                                                                                                                                                                  |
| <b>After treatment</b>                |                                                                                                                                                                                                                                                                                                                                                                                                                                                           |
| • Surgery                             | Pain<br>Impact on mobility: lessened strength, instability, loss of flexibility, and poor balance<br>- For a few patients, falls were a concern and limited their activities as consequences could be severe: <i>“A little poodle, yapping like anything, I suddenly put all my weight, to jump out the way, onto my left leg and I felt it break. It just literally split apart”</i>                                                                     |
| • Amputation and limb sparing surgery | Pain and restricted daily activities (irrespective of type of surgery). Pain management was particularly difficult in the first year after end of treatment                                                                                                                                                                                                                                                                                               |
| • Amputation                          | Unfamiliar sensations of ‘phantom pain’ were particularly disconcerting<br><i>“There doesn’t seem to be a lot of options in dealing with that, especially because, for me, I don’t have phantom pains every day, but I’ll get it randomly (...) it can be quite disconcerting and painful”</i>                                                                                                                                                            |
| • Long term effects                   | Even many years after end of treatment, some patients were still struggling with the impact of treatment<br>- <i>“The memory thing, that’s probably the one that affects me the most (...) it’s probably got a little bit worse (...) Whereas before cancer, everyone used to remark about how good my memory was”</i> (young adult, 5 years after treatment).<br>The longevity and unpredictability of some of these symptoms was troubling for patients |

**Emotional Well-being:** *I think emotional has been equally hard and challenging as the physical one*

1  
2  
3 Overall, the experience of PBC was described as difficult and traumatic. Patients managed  
4 the stages of treatment and the physical and emotional consequences of PBC differently (i.e. coping  
5 strategies) and some had to have professional support. While some patients described having low  
6 mood sometimes, others described having depression and made reference to suicidal ideation at  
7 some of their lowest points: *"I still suffer from very bad depression now (...) emotionally, I wasn't*  
8 *expecting to be that demanding"*. Anxiety and fear of recurrence was the emotional aspect of having  
9 a PBC that was shared by all patients as being difficult: *"you're left in a state of uncertainty, because*  
10 *obviously no-one can give you a definitive five year outlook. You're constantly having re-scans and*  
11 *everything. You've been through a very big thing and it's not really over. It might be, but you don't*  
12 *know, so that level of uncertainty is tricky at first to sort of get to grips with"*. In Table 3 the particular  
13 features of patients' experience at the stages of diagnosis, treatment decision-making and end of  
14 treatment (e.g. end of treatment was a transition point when support was needed) are presented,  
15 and Table 4 has the coping strategies and how patients accessed professional support across the  
16 disease trajectory. Moreover, as mentioned previously, patients' emotional well-being was  
17 significantly affected by the way in which they experienced physical symptoms and disabilities. We  
18 will describe below how their experience of PBC affected their identity and body image.  
19  
20  
21  
22  
23  
24  
25  
26  
27  
28  
29  
30  
31  
32  
33  
34  
35  
36  
37  
38  
39  
40  
41  
42  
43  
44  
45  
46  
47  
48  
49  
50  
51  
52  
53  
54  
55  
56  
57  
58  
59  
60

**Table 3.** PBC impact on emotional well-being at different points in the treatment pathway

| <b>Time Point</b>              | <b>Impact on emotional well-being</b>                                                                                                                                                                                                                                                                                                                                                                                                                                                                                                                                                                                                                                                                                                                                                                                                                                                                                                                                                                                        |
|--------------------------------|------------------------------------------------------------------------------------------------------------------------------------------------------------------------------------------------------------------------------------------------------------------------------------------------------------------------------------------------------------------------------------------------------------------------------------------------------------------------------------------------------------------------------------------------------------------------------------------------------------------------------------------------------------------------------------------------------------------------------------------------------------------------------------------------------------------------------------------------------------------------------------------------------------------------------------------------------------------------------------------------------------------------------|
| <b>At diagnosis</b>            | Fear, shock, panic, and feeling overwhelmed resulting in an inability to take in information<br>It helped if they were given the opportunity to ask questions later or had someone with them at hospital appointments                                                                                                                                                                                                                                                                                                                                                                                                                                                                                                                                                                                                                                                                                                                                                                                                        |
| <b>During treatment</b>        | The physical impact was difficult to cope with and had an impact on emotional well-being:<br><i>"I can remember asking at the clinic 'Does this get worse for each cycle because I'm already not coping?'"</i>                                                                                                                                                                                                                                                                                                                                                                                                                                                                                                                                                                                                                                                                                                                                                                                                               |
| - Chemotherapy<br>- Amputation | Chemotherapy was emotionally burdensome due to the physical impact it had on them<br>The devastating news of having to have an amputation and the lack of other options available were distressing<br><i>"I couldn't really-, based on the journals that I was reading, and based on the information that was available at the time, amputation just seemed like such a life-altering decision"</i>                                                                                                                                                                                                                                                                                                                                                                                                                                                                                                                                                                                                                          |
| <b>End of Treatment</b>        | The transition to being off treatment was challenging: the focus and structure of care while they were going through treatment disappeared:<br><i>"It's difficult, sort of, coming to terms with everything (...) trying to get used to being on the other side of it and not having to deal with any of the chemo or anything"</i><br><br>Reflection during this transition period resulted in some patients not knowing how to cope with their thoughts and feelings such as the uncertainty associated with PBC:<br><i>"I think it was post-traumatic (...) every little thing that went wrong, I thought it had come back (...) so then I was constantly going to the doctors all the time (...) I wasn't sleeping very well"</i>                                                                                                                                                                                                                                                                                        |
| <b>Follow-up</b>               | <b>Fear of recurrence</b><br>The regular appointments and scans (part of follow-up care) were a source of anxiety, a constant reminder of the uncertainty and potential for recurrence <ul style="list-style-type: none"> <li>- the period before appointments was extremely stressful: <i>"my anxiety levels peak, you know, just before my three-monthly check-up, and then once I've had my check-up, I, kind of, come right back down (...) next three-month, the cycle starts again (...) I would certainly say the first twelve months were awful"</i></li> </ul> <b>Time from diagnosis influenced patient's emotional experiences</b> <ul style="list-style-type: none"> <li>- Descriptions of feeling devastated, of losing their future, their identity were mainly present in the first two years from being diagnosed</li> </ul> <b>Negative Emotions</b> <ul style="list-style-type: none"> <li>- Guilt at having survived</li> <li>- Feeling upset due to the impact of the illness on their family</li> </ul> |



**Table 4.** How patients managed the impact of PBC impact on emotional well-being

| Coping mechanisms                                                                                                                                                                                                                                                                                                                                                                                                                                                                                                                                                                                                                                                                                                                                                                                                                                           | Professional support                                                                                                                                                                                                                                                                                                                                                                                                                                                                                                                                                                                                                                                                                                                                                                                                                                                                                                                                                                                                                                               |
|-------------------------------------------------------------------------------------------------------------------------------------------------------------------------------------------------------------------------------------------------------------------------------------------------------------------------------------------------------------------------------------------------------------------------------------------------------------------------------------------------------------------------------------------------------------------------------------------------------------------------------------------------------------------------------------------------------------------------------------------------------------------------------------------------------------------------------------------------------------|--------------------------------------------------------------------------------------------------------------------------------------------------------------------------------------------------------------------------------------------------------------------------------------------------------------------------------------------------------------------------------------------------------------------------------------------------------------------------------------------------------------------------------------------------------------------------------------------------------------------------------------------------------------------------------------------------------------------------------------------------------------------------------------------------------------------------------------------------------------------------------------------------------------------------------------------------------------------------------------------------------------------------------------------------------------------|
| <p><b>Strategies used by patients to manage the impact of PBC:</b></p> <ul style="list-style-type: none"> <li>- Focus on positive aspects of life (with some patients stating how lucky they were to still be alive)</li> <li>- Setting up goals which gave a sense of control over what was happening to them</li> <li>- Problem-solving, focusing on getting all the information about their diagnosis and treatment</li> <li>- Focusing on their own children while going through treatment and in their rehabilitation</li> <li>- Focusing on getting better <i>“I’ve got to deal with it, and I know I can get better”</i></li> <li>- Around half those interviewed acknowledged a positive change in their outlook in life <i>“I just became more relaxed about life, and probably appreciated small things more than a lot of people”</i></li> </ul> | <p><b>Timing of access to support:</b><br/>no one specific time; some during treatment, for others many years from treatment ending</p> <p><b>Access to professional support varied on the type of professional seen and how patients got access to this support:</b></p> <ul style="list-style-type: none"> <li>- Not discussing how they were feeling with their clinical team</li> <li>- Feeling low mood, anxiety, mild depression for a period of time before sharing with professionals who signposted to support</li> <li>- Seeing a psychologist while in hospital</li> <li>- Referral by their GP: <i>“I’m on the waiting list for a mindfulness course, which my GP has referred me on”</i></li> <li>- Receiving counselling over the phone</li> <li>- Home visits by professionals</li> <li>- Psychological support provided in hospital/primary care not adequate so additional support sought from charities</li> <li>- Youth support coordinators (only available for teenagers and young adults (TYA) treated in specialist TYA centres)</li> </ul> |
| <p><b>How patients managed the decision to have an amputation:</b></p> <ul style="list-style-type: none"> <li>- Focus on how it would increase their chances of survival: <i>‘I’m losing my leg, but I’m not losing my life’</i></li> <li>- Focus on how it would remove the cancer from their body</li> <li>- Talk with patients who had amputation to that it was still possible to have a <i>“normal”</i> life afterwards</li> <li>- Talk to someone who had undergone limb sparing surgery: <i>“having to live a life where you are constantly having to take pain-killers, is not really a good life. Although she would do it again, it’s not something she would recommend for somebody who is young”</i></li> </ul>                                                                                                                                 | <p><b>Barriers to support:</b></p> <ul style="list-style-type: none"> <li>- Patients not wanting to look weak</li> <li>- Patients finding it difficult to admit that after treatment they were not feeling happy</li> </ul> <p><b>Facilitators of support:</b></p> <ul style="list-style-type: none"> <li>- Being advised by other patients to seek help was often a catalyst- Having a good relationship with the General Practitioner (GP) facilitated patient’s disclosure of needing support</li> </ul>                                                                                                                                                                                                                                                                                                                                                                                                                                                                                                                                                        |

1  
2  
3 The physical consequences of PBC were so pervasive they affected patients' identity, how  
4 they saw themselves and what they could expect from their body, a body with different abilities and  
5 restrictions: *"I suppose just coming to terms with the fact that my body and my mind have changed  
6 and that's part of it. It's not just being ill and having the treatment, it's everything that comes  
7 afterwards too"*. Throughout participants' descriptions of their experiences there was a continuous  
8 negotiation between the "old" self and the changes imposed by their diagnosis and treatment, and  
9 the recovery process took time. There were also numerous examples of the way in which PBC  
10 treatment had affected patients' physical appearance, and as a result, their confidence and identity.  
11 While some changes were specific to the treatment phase, others were not, and the acceptance of  
12 the altered body was an ongoing challenge for patients *"I didn't realise how much your body image  
13 affects your confidence. You know, that was something else that I would speak to the counsellor  
14 about that perhaps I couldn't speak about to my partner"*.

15  
16 For patients who had an amputation, the pressure of trying to get back to 'normal', and to be  
17 seen as 'normal', was more salient than in patients who did not have an amputation. While some  
18 patients were able to resume or continue what they were able to do before the diagnosis others  
19 found the impact on their lives completely disruptive: *"I had an amputation to deal with, so my  
20 identity from what I assumed I looked like had just been completely devastated really (...) I looked  
21 like something else, or someone else"*. There was a conscious knowledge that 'normal' was  
22 something different after the surgery and it had an impact on how they saw themselves and how  
23 others saw them. Being dependent on others was hard, undressing in public spaces took time for  
24 them to get used to *"Due to amputation, I don't want my wife to take me in the wheelchair  
25 somewhere here or there so, I have to wait until chemo is over and I might get a little bit better  
26 walking with my prosthetic and get a normal body"*. Others remarked on how the growth of  
27 Paralympics had a positive impact on awareness of people with prostheses by the public.

28  
29 In addition to the influence of type of surgery on the patient's experience, patient's stage of  
30 life also influenced the emotional experiences. In particular, young adults (i.e. patients aged up to  
31 40 years old) who were transitioning to a new job, building romantic relationships, wanting to start a  
32 family, described their identify, expectations for the future in terms of employment, romantic  
33 relationships being changed and away from their peers. For example, this young adult reflected on  
34 the emotional impact of infertility caused by treatment: *"That made me feel really isolated from  
35 people (...) I've always wanted a family, so that has been probably the biggest thing that I've had to  
36 overcome"*.

37  
38  
39  
40  
41  
42  
43  
44  
45  
46  
47  
48  
49  
50  
51  
52  
53  
54  
55 **Social Well-being:** *Everyone was very supportive. Everyone came around*

56  
57 As described above, the physical and emotional impact of PBC and the effect of treatment  
58 on patients' body image had a profound impact on social activity and well-being. The diagnosis,  
59  
60

1  
2  
3 duration of treatment, frequent hospitalisations, and restrictions imposed during and after end of  
4 treatment caused disruption to various aspects of the patients' social life, including their  
5 relationships (emotional and sexual), work/school and leisure activities. The impact on these sub  
6 domains of social well-being and how these experiences varied according to patient's age or stage  
7 in life and disease related factors are shown in more detail in Appendix 2. A common element of  
8 patients' experiences was feeling closer to their family, but the caring responsibilities the patient had  
9 varied according to whether they were teenagers, young or older adults (Appendix 2). Similarly it is  
10 shown how the impact on romantic and sexual relationships and fertility concerns were mainly  
11 concerns of young adults (under 40), but the lack of discussion about sexuality and intimacy with  
12 their clinical teams was common irrespective of participant's age.

13  
14 The impact of surgery and treatment on mobility and its side-effects affected patient's ability  
15 to participate in school/work, sports and social activities with peers and family (e.g. patients  
16 described being excluded of playing with their children). The interlinked impact of physical and  
17 social well-being resulted in a negative effect on emotional well-being: *"I was just really upset,  
18 because I want to go ice skating. I'm not allowed to go ice skating and it's just like, everybody else  
19 can do it, and I can't, and I'm just-, it's just, sort of, I was quite upset about it, because, I don't know,  
20 why did it happen to me?"*

21  
22 The analysis of the impact of PBC on different domains of social well-being also revealed  
23 that relationships had a central role in supporting patients in the management of the impact of PBC  
24 as described below.

25  
26 Relationships: I've got very frustrated about things; she's dealt with that and supported me

27  
28 Family and friends had an important role supporting patients through their treatment and  
29 recovery. The support received was both practical and emotional and had a particularly salient role  
30 for different age groups. For teenagers, parents had a central role in communicating with healthcare  
31 professionals and providing emotional and practical support. Many teenagers reported receiving  
32 messages of support through social media while they were in hospital, which made a positive  
33 difference. For adults, partners or family were mentioned as being important. Extended family  
34 support was crucial, with grandparents and sometimes friends helping parents (patient and partner)  
35 with childcare during the treatment phase: *"You know, my partner still had to go to work, and so my  
36 mum looked after my children for me, and I'm quite fortunate".*

37  
38 Conversely, patients who had no partner or close family, or those with elderly parents who  
39 were not able to support them, had to rely on professional carers. When their mobility was  
40 compromised this led to social isolation: *"This severely restricts me. I only really leave the house to  
41 go to [family house] (...) I think I've only gone out at night, sort of, socially, since this happened  
42 [more than 2 years ago] probably about eight times"*

43  
44 Friends were important in making patients feel 'normal' again, by not treating them  
45 differently, by showing up and continuing to do leisure activities: *"I was still on crutches (...)and just*

1  
2  
3 said, *‘Thank you for this, it just made me feel normal’* or even by using humour as described here:  
4 *‘My friends still act the same way around me. So far I have been called Long John Silver, Hopalong*  
5 *Cassidy, Hoppy, Ironside. Basically, they’re all cracking jokes about it, and that I do like’*.  
6  
7

8 Most patients also described the benefits of being in contact with other patients, either face-  
9 to-face or online. This helped them to feel normal (*‘if you hear they’re struggling about certain things*  
10 *and you can relate to them, you start realising it’s normal’*), share experiences and find out practical  
11 tips (e.g. travel insurance) on how to deal with specific issues linked with their diagnosis and  
12 treatment.  
13  
14  
15

### 16 17 **The Role of Healthcare Professionals:** *They were experts in what they were doing*

18 The expertise of clinical teams was valued by participants, especially if their route to  
19 diagnosis had been long and complex, which was the case for most patients. The specialist skills  
20 and experience of clinical teams restored patients’ trust in the healthcare profession, as this had  
21 often been eroded by the time patients got to diagnosis. Many patients described how the  
22 healthcare team worked collaboratively to best support them.  
23  
24  
25

26 All participants referred to being given information by the specialist team, asking questions  
27 and feeling supported. However, the timing and delivery of information was not always optimal, with  
28 some patients receiving information over the phone and then having to wait for the appointment with  
29 the specialist team to have their questions answered or concerns clarified. This was a period of  
30 distress for patients, with some looking for information online, which led to more distress. In  
31 contrast, when patients were guided towards specific online resources after meeting with their  
32 specialist clinical team, they were very positive about this.  
33  
34  
35  
36

37 The clinical nurse specialist (CNS) was a key point of contact for all patients, s/he provided  
38 practical and emotional support, information about diagnosis and treatment and support available  
39 (e.g. support groups; professional psychological support). CNS were also described as being  
40 approachable and available: *‘So, [CNS] was really a stable point for me to go to for any sort of*  
41 *information or support’*.  
42  
43  
44

45 The transition from specialist centres back to receiving care in local hospitals was at times  
46 problematic, as patients felt local care teams were not knowledgeable: *‘Awful. Nobody knew what to*  
47 *do with me (...) Nobody would use my Hickman line’*. Where physiotherapy needs were not met by  
48 local services, some patients had to access services privately instead *‘So, I suffer a dropped foot*  
49 *as a result (...) I was just given some exercises to do on a sheet (...) So, I’ve since been seeing a*  
50 *private physio. They’ve really helped and worked wonders for my leg.’* The importance of timely and  
51 expert physiotherapy support was consistently emphasised as crucial to recovery. For example,  
52 one patient said *‘My wheelchair was already here when I came home from hospital, but they*  
53 *immediately built a ramp, so I could get out of the house on my wheelchair (...) They were really*  
54 *good and I immediately started to feel so much better’*.  
55  
56  
57  
58  
59  
60

## DISCUSSION

The aim of this study was to explore the experiences of patients with PBC. These cancers are characterised by: commonly being associated with severe pain as a presenting symptom, more often affecting younger people; the need for very intensive and toxic chemotherapy regimens; surgical treatments which cause life-long morbidity; and unsatisfactory cure rates.

While the altered body and level of impairment had a significant impact on patient's physical, emotional and social well-being, it was shown that support and expertise of professionals involved in patients' care, the perceived emotional and practical support received/available and patients own way of adapting to the changes caused by PBC influenced the recovery process. In addition, patients' experience was influenced by where they were in their disease trajectory (e.g. diagnosis, treatment, end of treatment, follow up, or recurrence) and their developmental stage in life (i.e. if the patient was a teenager, a young or older adult). The disease trajectory helped explain that there were certain points in their pathway that were particularly challenging for patients (e.g. end of treatment). Another important aspect was the stage where the patients were in their lives, if they were teenagers going through the challenges of school and establishing friendships or young adults establishing new romantic relationships, entering a new job or starting a family, or adults with children and mortgages, or older adults close to retirement or retired. These different challenges were intertwined with their experience of PBC and affected the support needed and how they managed their own experience.

Our study adds to the growing body of evidence supporting the need to adopt an age-specific approach to the management of patients with sarcoma as their support needs might be different. Research as shown, for example, that a cancer diagnosis during teenage and young adulthood has an acute and unique impact on this critical and complex stage of life development, disrupting physical health, social and educational goals as well as psychological well-being.<sup>30</sup> This is further supported in a national survey of patients' experiences in the UK which showed differences according to age – teenagers and young adults were significantly more likely to report most side-effects and post-treatment concerns than older patients; elderly patients were more satisfied with the information and emotional support provided than younger patients.<sup>31</sup>

The main findings showed that physical impairment had a significant impact on a patient's identity, with patients trying to get back to 'normal' or finding a 'new normal', which meant changing or adapting their daily activities, leisure time and school/work, this extended long after the initial treatment phase. This is in line with findings from other qualitative research<sup>21,32,14,22,24</sup>. In addition to the physical limitations following PBC treatment, self-perception and other's perceptions of the altered body interfered with patient's body image, which had an impact on confidence in social interactions (e.g. not wanting to go out) and intimate relationships (e.g. feeling less attractive), findings which are consistent with previous research<sup>23,33,34</sup>. This study showed that emotional well-being changed along the different phases of PBC trajectory with the first and second years after

1  
2  
3 diagnosis particularly physically and emotionally challenging for patients<sup>5</sup>. After the end of  
4 treatment, patients reported fear of recurrence and this was constantly brought to the forefront of  
5 their minds due to regular follow up appointments and scans (mainly patients within 5 years of  
6 diagnosis). These findings are contrary to Fauske's et al.<sup>23</sup> findings where the majority of the eight  
7 patients with osteosarcoma in the lower extremity (who were aged 18-50 and had been diagnosed  
8 for 3 to 10 years) who took part in the study did not report fear of recurrence. These contrasting  
9 results might be due to the focus of the interviews in Fauske's et al.<sup>23</sup> study – how has cancer  
10 changed your life and how it has changed you as a person – and our goal to cover patients  
11 experience from the point of diagnosis onwards.  
12  
13

14  
15  
16  
17 Moreover, patients in our study reported low mood, depression, anxiety and even suicidal  
18 ideation, with a few patients reporting more severe cases of depression or anxiety. This is  
19 consistent with previous research that has shown that although the majority of participants reported  
20 non-clinical anxious and depressive symptoms a significant minority experienced clinically relevant  
21 distress symptoms long after their treatment ended<sup>19</sup>. One last element in understanding patient's  
22 emotional well-being, shared by all, was the intensity and duration of chemotherapy and  
23 radiotherapy and how difficult it was for them physically and emotionally. Although exposure to  
24 intensive chemotherapy has been identified as adding to the risk for depression and somatic  
25 distress among both leukaemia and lymphoma survivors<sup>35</sup>, we do not know the impact/risk of  
26 treatments on patients with PBC. Conversely, there were also reports of positive growth in our  
27 study. This was, for some, more straightforward due to their personality and/or timely professional  
28 and informal support available. But this might also reflect Bekkering's et al.<sup>36</sup> suggestion that similar  
29 psychological status of patients with sarcoma and healthy peers found in their study was due to  
30 positive emotions felt after completion of treatment and survival, in what was termed the "response  
31 shift".  
32  
33

34  
35  
36  
37  
38  
39  
40  
41 It was in the absence of certain elements of support that more negative experiences were  
42 revealed. It was shown that family and friends gave emotional and practical support, but those who  
43 did not have this support were at risk for worse emotional and social well-being. While the majority  
44 of patients in this study reported adapting to the changes in mobility, there were some who had  
45 either their mobility severely compromised or were physically constrained by side effects of  
46 treatment such as severe fatigue. These were also patients who were at higher risk for worse  
47 emotional and social well-being. Consistent with a review of survivorship after extremity sarcoma<sup>5</sup>,  
48 this study showed that physiotherapy and psychological support were crucial to the recovery  
49 process; however, neither was reliably provided at the most needed times for all patients.  
50  
51

52  
53  
54  
55 Our study had a number of limitations. A self-selected group of patients with a wide age  
56 range (13-77 years old) and at different points in their timeline (from newly diagnosed to patients  
57 who were more than 10 years from diagnosis) took part in the study. While this heterogeneity of the  
58 sample might be representative of the heterogeneity of this group of patients; some patients were  
59  
60

1  
2  
3 reporting their experience of being newly diagnosed while others were reflecting on their experience  
4 of more than 10 years ago. It should be noted that patients described their experiences throughout  
5 the different phases and while newly diagnosed patients were able to give more detailed  
6 descriptions of that phase, this information was complemented by patients who had some  
7 perspective over their thoughts and feelings during that phase and what followed. Another limitation  
8 refers to the sample in terms of age, considering PBC peaks during adolescence/young adulthood,  
9 younger patients aged 13-24 years (current age) accounted for 15% of participants in this study.  
10 While saturation was reached on the issues raised by those who participated, a larger sample would  
11 have given us greater certainty that we could identify all the key issues across all the age groups.  
12 Nevertheless, this is a qualitative study and the aim was not generalisability, but the in-depth and  
13 credible analysis of patients' experiences of PBC across different age groups, gender, time from  
14 diagnosis, treatment types and anatomical sites. Moreover, our study makes an important  
15 contribution to the evidence, most notably the influencing factors of patient experiences across time.

16  
17 PBC has a negative impact on physical, emotional and social well-being. The extent of this  
18 impact might be felt long after treatment has ended or be specific to the end of treatment phase.  
19 Longitudinal studies are needed to better understand how patients recover, adapt and adjust to the  
20 changes imposed by diagnosis and treatment, their needs at different points in the timeline, and the  
21 impact of the support received. In addition, prospective studies, whether qualitative or quantitative,  
22 must include an exploration of changes in sexuality, fears of recurrence and impact on social and  
23 work activities, in order to underpin more holistic models of survivorship care. In clinical practice, the  
24 assessment of support in different phases of the disease trajectory is important for the identification  
25 of patients who may be at a higher risk for poor adjustment, and therefore, for targeting screening  
26 measures and interventions to those patients most likely to benefit. Clinical interventions must take  
27 into consideration the timing and types of support provided. In particular for this population, it was  
28 shown again the need to ensure patients have access to physiotherapy and psychology services  
29 and the relevance of support to return to work or school/university. Lastly, as improvements in  
30 survival seem elusive at the moment then improving the experiences and quality of life for this  
31 patient group is paramount. While qualitative research has detailed the disruption and changes in  
32 patient's experiences as a consequence of PBC, quantitative research has not consistently shown  
33 the impact of PBC on patient's quality of life; hence research is needed to improve patient  
34 experience and quality of life measures.

35  
36 Patients with PBC experiences were influenced by the intensity of treatment and side effects  
37 that had an impact long after the treatment phase had ended. Mobility constraints, pain and fatigue  
38 influenced their participation in employment/education and leisure activities. The physical changes  
39 had also an impact on body image and their identity. Physical recovery was critical for their overall  
40 well-being and management of getting 'back to normal'. This study gave insight into factors which  
41 might influence adjustment over time, for better or for worse, showing that these affect patients at  
42  
43  
44  
45  
46  
47  
48  
49  
50  
51  
52  
53  
54  
55  
56  
57  
58  
59  
60

1  
2  
3 different life stages in which illness can disrupt important developmental milestones. These factors  
4 need to be taken into consideration to better understand and improve patients with PBC  
5 experiences.  
6  
7  
8  
9  
10  
11  
12  
13  
14  
15  
16  
17  
18  
19  
20  
21  
22  
23  
24  
25  
26  
27  
28  
29  
30  
31  
32  
33  
34  
35  
36  
37  
38  
39  
40  
41  
42  
43  
44  
45  
46  
47  
48  
49  
50  
51  
52  
53  
54  
55  
56  
57  
58  
59  
60

For peer review only



## REFERENCES

1. Gerrand C, Athanasou N, Brennan B, et al. UK Guidelines for the Management of Bone Sarcomas. *Clin Sarcoma Res* 2016;6:1-21.
2. National Cancer Intelligence Network (NCIN). Bone and Soft Tissue Sarcomas. UK Incidence and Survival 1996–2010 version 2.0. <http://www.ncin.org.uk/publications/reports/> (Accessed 25 Oct 2018).
3. Casali PG, Abecassis N, Bauer S, et al. on behalf of the ESMO Guidelines Committee, ERN PaedCan and ERN EURACAN. Bone sarcomas: ESMO–PaedCan–EURACAN: Clinical Practice Guidelines for diagnosis, treatment and follow-up. *Ann Oncol* 2018;29(Suppl 4):iv79–iv95.
4. Whelan JS, Jinks RC, McTiernan A, et al. Survival from high-grade localised extremity osteosarcoma: combined results and prognostic factors from three European Osteosarcoma Intergroup randomised trials. *Ann Oncol* 2012;23:1607–16.
5. Kwong TN, Furtado S, Gerrand C. What do we know about survivorship after treatment for extremity sarcoma? A systematic review. *Eur J Surg Oncol* 2014;40:1109-24
6. Ginsberg JP, Rai SN, Carlson CA, et al. A comparative analysis of functional outcomes in adolescents and young adults with lower-extremity bone sarcoma. *Pediatr Blood Cancer* 2007, 49:964-9.
7. Hinds PS, Billups CA, Cao X, et al. Health-related quality of life in adolescents at the time of diagnosis with osteosarcoma or acute myeloid leukemia. *Eur J Onc Nurs* 2009;13:156-63.
8. Department of Health. National Cancer Patient Experience Survey 2017: National Report. <http://www.ncpes.co.uk/reports/2017-reports/national-reports-2/3579-cpes-2017-national-report/file;> (Accessed 25 Oct 2018).
9. Eiser C, Darlington AE, Stride CB, et al. Quality of life implications as a consequence of surgery: limb salvage, primary and secondary amputation. *Sarcoma* 2001;5:189-95.
10. Hopyan S, Tan JW, Graham HK, et al. Function and upright time following limb salvage, amputation, and rotationplasty for pediatric sarcoma of bone. *J Pediatr Orthop* 2006;26:405-8.
11. Akahane T, Shimizu T, Isobe K, et al. Evaluation of postoperative general quality of life for patients with osteosarcoma around the knee joint. *J Pediatric Orthop, Part B* 2007;16:269-72.
12. Expósito Tirado JA, Márquez Vegab C, Muro Guerraa C, et al. Calidad de vida y funcionalidad en pacientes pediátricos intervenidos de tumores óseos en miembros inferiores: Cirugía reconstructiva versus amputación. *Rehabilitación* 2011;45:313-9.
13. Barrera M, Teall T, Barr R, et al. Health related quality of life in adolescent and young adult survivors of lower extremity bone tumors. *Pediatr Blood Cancer* 2012;58:265-73.
14. Davidge K, Bell R, Ferguson P, et al. Patient expectations for surgical outcome in extremity soft tissue sarcoma. *J Surg Oncol* 2009;100:375-81.
15. Felder-Puig R, Formann AK, Mildner A, et al. Quality of life and psychosocial adjustment of young patients after treatment of bone cancer. *Cancer* 1998;83:69-75.
16. Barrera M, Teall T, Barr R, et al. Sexual function in adolescent and young adult survivors of lower extremity bone tumors. *Pediatr Blood Cancer* 2010;55:1370-6.
17. Singh R, Ripley D, Pentland B, et al. Depression and anxiety symptoms after lower limb amputation: the rise and fall. *Clin Rehabil* 2009;23:281–286.
18. Koopman HM, Koetsier JA, Taminiu AHM, et al. Health-related quality of life and coping strategies of children after treatment of a malignant bone tumor: a 5-year follow-up study. *Pediatr Blood Cancer* 2005;45:694-9.

19. Paredes T, Pereira M, Simões MR, Canavarro MC. A longitudinal study on emotional adjustment of sarcoma patients: the determinant role of demographic, clinical and coping variables. *Eur J Cancer Care* 2012;21:41–51.
20. Tang MH, Castle DJ, Choong PFM. Identifying the Prevalence, Trajectory, and Determinants of Psychological Distress in Extremity Sarcoma. *Sarcoma* 2015;2015:745163.
21. Parsons JA, Eakin JM, Bell RS, Franche R-L, Davis AM. So, are you back to work yet?' Re-conceptualizing 'work' and 'return to work' in the context of primary bone cancer. *Soc Sci Med* 2008;67(11):1826–1836.
22. Brown A, Parsons JA, Martino C, et al. Work status after distal femoral kotz reconstruction for malignant tumors of bone. *Arch Phys Med Rehabil* 2003;84(1):62-68.
23. Fauske L, Bondevik H, Bruland OS, Ozakinci G. Negative and Positive Consequences of Cancer Treatment Experienced by Long-term Osteosarcoma Survivors: A Qualitative Study. *Anticancer Res* 2015;35:6081-90.
24. Fauske L, Bruland OS, Grov EK, Bondevik H. Cured of Primary Bone Cancer, But at What Cost: A Qualitative Study of Functional Impairment and Lost Opportunities. *Sarcoma* 2015;2015:484196.
25. Fauske L, Lorem G, Grov EK, Bondevik H. Changes in the Body Image of Bone Sarcoma Survivors Following Surgical Treatment—A Qualitative Study. *J Surg Oncol* 2016;113:229–234.
26. Mason J. Qualitative researching. London: SAGE Publications Ltd 2002:1-10.
27. Storey L, Fern LA, Martins A, et al. A Critical Review of the Impact of Sarcoma on Psychosocial Wellbeing. *Sarcoma* 2019; 2019:1-18.
28. Bredart A, Marrel A, Abetz-Webb L, Lasch K, Acquadro C. Interviewing to develop patient-reported outcome (PRO) measures for clinical research: eliciting patients' experience. *Health Qual Life Outcomes* 2014;12:15.
29. Taylor RM, Gibson F, Franck LS. A concept analysis of health-related quality of life in young people with chronic illness. *J Clin Nurs* 2008;17(14):1823-1833.
30. Morgan S, Davies S, Palmer S, et al. Sex, drugs, and rock 'n' roll: caring for adolescents and young adults with cancer. *J Clin Oncol* 2010;28:4825–30.
31. Younger E, Husson O, Bennister L, et al. Age-related sarcoma patient experience: results from a national survey in England. *BMC Cancer* 2018;18:991.
32. Earle EA, Eiser C, Grimer R. He never liked sport anyway'-Mother's views of young people coping with a bone tumour in the lower limb. *Sarcoma* 2005;9(1-2):7–13.
33. Lehmann V, Gronqvist H, Engvall G, et al. Negative and positive consequences of adolescent cancer 10 years after diagnosis: an interview-based longitudinal study in Sweden. *Psychooncology* 2014;23(11):1229-1235.
34. Rasmussen DM, Hansen HP, Elverdam B. How cancer survivors experience their changed body encountering others. *Eur J Oncol Nurs* 2010;14(2):154-159.
35. Zebrack BJ, Zeltzer LK, Mertens AC, Odom L, Berkow R, Robisom LL. Psychological outcomes in long-term survivors of childhood leukemia, Hodgkin's disease, and non-Hodgkin's lymphoma: a report from the Childhood Cancer Survivor Study. *Pediatrics* 2002;110(1 Pt 1):42-52.
36. Bekkering WP, van Egmond-van Dam JC, Brammer JAM, Beishuizen A, Fiocco M, Dijkstra PDS. Quality of life after bone sarcoma surgery around the knee: A long-term follow-up study. *Eur J Cancer Care*. 2017;26(4):1-9.

## Appendix 1 - Interview schedule

|                                                                                           |                                                                      |                                                                                                                                                                                                                                                                                                                                                                                                                                                                                                                                                                                                                                                                                                                                                                                                                                                                                     |
|-------------------------------------------------------------------------------------------|----------------------------------------------------------------------|-------------------------------------------------------------------------------------------------------------------------------------------------------------------------------------------------------------------------------------------------------------------------------------------------------------------------------------------------------------------------------------------------------------------------------------------------------------------------------------------------------------------------------------------------------------------------------------------------------------------------------------------------------------------------------------------------------------------------------------------------------------------------------------------------------------------------------------------------------------------------------------|
| 1<br>2<br>3<br>4<br>5<br>6<br>7<br>8<br>9<br>10<br>11<br>12<br>13<br>14<br>15<br>16<br>17 | Welcome and introduction; Study aim; Participation & confidentiality | Thank you for agreeing to take part in this study. I want to remind you that what we talk about will be kept confidential. Nothing you say will be shared with your healthcare team. Only a report summary of the interviews will be given out. Your name will not be on the written record of your interview and the audio recording will be destroyed when the study is complete. Can I check that you are still happy to take part and for me to record the interview? If at any time you want to stop talking just let me know and I will stop.<br>The reason I want to talk to you is to find out what it is like being diagnosed, treated and living with a sarcoma diagnosis. There may be things that have been challenging but also things that have been okay. I want to know about the things that are most important to you. Do you have any questions before we start? |
| 18<br>19<br>20<br>21<br>22<br>23<br>24                                                    | Diagnosis, treatment timeline and experiences                        | Do you want to tell me about the time you found out you had sarcoma?<br><ul style="list-style-type: none"> <li>• <i>What type of sarcoma do you have [location]?</i></li> <li>• <i>What was your treatment(s) experience?</i></li> <li>• <i>What was your care experience [place of care and delivery of care]?</i></li> <li>• <i>Where are you now in the journey [treatment end, relapse etc.]?</i></li> <li>• <i>If treatment ended, how long ago?</i></li> </ul>                                                                                                                                                                                                                                                                                                                                                                                                                |
| 25<br>26<br>27<br>28<br>29<br>30<br>31<br>32<br>33<br>34<br>35<br>36<br>37                | Physical health                                                      | How satisfied are you with your health? (If not, then explore why not)<br>How important is was physical health to you?<br>How do you ensure you are living a healthy life?<br>Is your physical health impaired due to their sarcoma [amputation, general weakness, pain, fatigue]?<br><ul style="list-style-type: none"> <li>• <i>Do you need anyone to help you with activities of daily living (washing, dressing, going to the toilet)?</i></li> <li>• <i>Establish this is due to sarcoma and not present pre-diagnosis</i></li> <li>• <i>How do you feel about this?</i></li> <li>• <i>Do you have any late-effects (if some time out of treatment) – impact on general well-being</i></li> </ul>                                                                                                                                                                              |
| 38<br>39<br>40<br>41<br>42<br>43<br>44                                                    | Emotional health                                                     | How have you been feeling in the last 3 months?<br><ul style="list-style-type: none"> <li>• <i>Do you feel sad [prompts – feel low, anxious, depressed]? How often?</i></li> <li>• <i>If they do, explore what triggers this, what they do about it, how often it happens</i></li> <li>• <i>Have they been able to access any professional help (if they wanted it and ease of accessing it)</i></li> </ul> How do you feel about your body image and appearance?                                                                                                                                                                                                                                                                                                                                                                                                                   |
| 45<br>46<br>47<br>48<br>49<br>50<br>51<br>52<br>53<br>54                                  | Social well-being                                                    | Are you employed/in education? (Explore how this has been since diagnosis)<br><ul style="list-style-type: none"> <li>• Have there been any challenges?</li> <li>• Have new opportunities been available that weren't pre-diagnosis?</li> </ul> How has your relationship with other people been since your diagnosis?<br><ul style="list-style-type: none"> <li>• <i>Explore impact on family, friends and changes in relationships.</i></li> <li>• <i>For patients over 16, explore sexual identify/sex life</i></li> </ul> How has your diagnosis affected your financial well-being?<br>Do you have opportunities for leisure activities?                                                                                                                                                                                                                                        |
| 55<br>56<br>57<br>58<br>59<br>60                                                          | Final comments and wrap up                                           | Any other information you feel is important for me to know, but that I didn't ask about?<br>Thank you for sharing your experiences with us.                                                                                                                                                                                                                                                                                                                                                                                                                                                                                                                                                                                                                                                                                                                                         |

## Appendix 2. PBC impact on social well-being

| Social Well-Being Domain | Impact                                                                                                                                                                                                                                                                                                                                                                                                                                                                                                                                                                                                                                                                                                                                                                                                                                                                                                                                                                                                                                                                                                                                                                                                                                                                                                                                                                                                                                                                                                                                                                                                                                                                                                                                                                                                                                                                                                                                                                                                                                                                                                                                                                                                                                                                                                                                                                                                                                                                                                                                            |
|--------------------------|---------------------------------------------------------------------------------------------------------------------------------------------------------------------------------------------------------------------------------------------------------------------------------------------------------------------------------------------------------------------------------------------------------------------------------------------------------------------------------------------------------------------------------------------------------------------------------------------------------------------------------------------------------------------------------------------------------------------------------------------------------------------------------------------------------------------------------------------------------------------------------------------------------------------------------------------------------------------------------------------------------------------------------------------------------------------------------------------------------------------------------------------------------------------------------------------------------------------------------------------------------------------------------------------------------------------------------------------------------------------------------------------------------------------------------------------------------------------------------------------------------------------------------------------------------------------------------------------------------------------------------------------------------------------------------------------------------------------------------------------------------------------------------------------------------------------------------------------------------------------------------------------------------------------------------------------------------------------------------------------------------------------------------------------------------------------------------------------------------------------------------------------------------------------------------------------------------------------------------------------------------------------------------------------------------------------------------------------------------------------------------------------------------------------------------------------------------------------------------------------------------------------------------------------------|
| Relationships            | <p><b>Impact on patients' relationships with family and friends</b><br/>           Diagnosis brought them closer to loved ones, but loss of contact with friends who did not support them through their experience.<br/>           Greater appreciation of the time with loved ones after diagnosis</p> <p><b>Impact of feeling overwhelmed by treatment</b><br/>           Resulted in implications on relationships with those closer to them</p> <p><b>Additional caring responsibilities for partners</b><br/>           Challenges in managing day to day tasks with restricted mobility was difficult for both patients and their partners, particularly when the main carer had additional caring responsibilities: <i>"my wife and kids, it's affected them a lot more (...) I don't get anybody else to look after me. It's only my wife who has to do it so, there's a lot of little things which is time, energy consuming and extra load on their work as well".</i></p> <p><b>Challenge of disclosing diagnosis to others</b><br/>           At the end of treatment interaction with new friends, romantic partners, and co-workers was challenged by the decision to disclose their diagnosis (particularly in young adults): <i>"I feel it's very isolating because for me it was such a personal experience that I find it hard to share with people"</i></p> <p><b>Sexuality, fertility and intimacy</b><br/> <u>Patients without partners (mainly patients aged 20-30 years old)</u> <ul style="list-style-type: none"> <li>- Difficulty in establishing intimate relationships: altered body image and side-effects of treatment: <i>"I just accept no woman would really have any interest in me"</i></li> <li>- Infertility and the need to consider alternative methods of conception: <i>"when you're dating, when is an acceptable time to tell a girl that you're infertile?"</i>.</li> </ul> <u>Patients with partners</u> <ul style="list-style-type: none"> <li>- Brought couples closer together</li> <li>- If there was an impact of PBC on sexuality it was limited to the treatment phase: <i>"Unfortunately, that can't happen at the moment. One of the side-effects of one of the pills I'm on is actually erectile dysfunction"</i></li> <li>- Adaptation in sexual practices to accommodate changed bodies</li> </ul> <u>Older patients (patients aged 61 or older)</u> <ul style="list-style-type: none"> <li>- Adopted other forms of intimacy e.g. by cuddling and supporting each other</li> </ul> </p> |

- 1
- 2
- 3 - *"I mean, our sexuality had gone some good time ago to be honest, so it's not really affected that but we're still a*
- 4 *close couple"*
- 5 - Impact of having an amputation on sex life long after the end of treatment. *"I think that's more of a mind thing from*
- 6 *my point of view, because obviously in bed, I don't wear my prosthesis (...) we don't really discuss it"*
- 7

8 School/University/  
9 Work

### Teenagers and young adults

10 Being in hospital disrupted school/university life: *"I haven't been to school for three months now"*.

11 Returning to school showed this to be an important sign of regaining normality but depended on the way teachers  
12 handled changes in physical abilities. Phased return to school/university and support available was critical.

13  
14 Feelings of insecurity because of lack of experience in the workplace and the uncertainty of being new in a job: *"I was*  
15 *really concerned with obviously starting a new job, the implications of this illness when I'd just started. I didn't know*  
16 *regarding sick pay and things like that, and whether they might just get rid of me"*

### Adults

17  
18 Some patients had their jobs secured for the time they were going through treatment or they were already retired  
19 Some patients opted for early retirement or had to reduce their working hours due to fatigue or physical impairment

20  
21  
22 Most patients had a phased return to work due to fatigue and mobility restrictions, as well as the emotional strain of  
23 having PBC, but the options were limited for patients who owned their business or worked as freelancers

24  
25 For some patients the physical limitations/restrictions imposed by treatment/surgery led to a career change or redefinition  
26 of career aspirations: *"I had to decide to do something else, something which I could do, something where I could*  
27 *improve and where my [physical] situation wouldn't affect my career so badly"*

### Financial impact

28  
29 The experiences were a result of a combination of financial support available and the possibility to either return to work or  
30 find an alternative carer pathway

- 31
- 32 - type of employment contract, size of the company, availability of health insurance and personal savings or family  
33 financial support available had an impact on financial wellbeing
- 34 - When the consequences of treatment were so pervasive, patients were not able to work, had no access to family  
35 support or savings, and had to access benefits, this had a negative impact on their financial well-being: *"The effect*  
36 *it's had on me is I can't afford to go out anywhere. I can't afford to buy myself anything (...) people don't*  
37 *understand how tight things can be financially"*.
- 38  
39  
40  
41  
42  
43  
44  
45  
46

1  
2  
3 Participation in  
4 leisure activities

### Impact of pain

Managing pain whilst trying to take part in the activities they enjoyed was a challenge

- e.g., following limb sparing surgery a patient described how he endured the pain and restrictions imposed by it: “*I do go to [activity], but I do experience extreme pain after*”

### Impact of fatigue

Fatigue and lack of energy were experienced long after the initial treatment phase

Patients identified triggers and managed their day to accommodate it, but the reality was that fatigue had a profound effect on their participation in social activities, work and school performance, as well as affecting emotional well-being: “*I’m careful about not pushing myself too much, but also it’s quite unpredictable really. I know that if I do a lot then I will pay for it (...) I just allow myself to cancel plans and go to bed*”.

## COREQ

### Domain 1: Research team and reflexivity

#### Personal Characteristics

1. Interviewer/facilitator - Page 6
2. Credentials – Page 1
3. Occupation – Page 1
4. Gender – Page 6/Page 1
5. Experience and training - Page 1/Page 6

#### Relationship with participants

6. Relationship established - Page 6
7. Participant knowledge of the interviewer - Page 6
8. Interviewer characteristics – X

### Domain 2: study design

#### Theoretical framework

9. Methodological orientation and Theory - Page 6

#### Participant selection

10. Sampling – Page 8
11. Method of approach - Page 6
12. Sample size – Page 7
13. Non-participation – X

#### Setting

14. Setting of data collection- Page 6
15. Presence of non-participants - Page 6
16. Description of sample - Page 7

#### Data collection

17. Interview guide – Appendix 1

- 1
- 2
- 3 18. Repeat interviews – Page 6
- 4
- 5 19. Audio/visual recording - Page 6
- 6
- 7 20. Field notes - Page 6
- 8
- 9 21. Duration - Page 6
- 10
- 11 22. Data saturation – Page 19
- 12
- 13 23. Transcripts returned - X
- 14
- 15

### 16 **Domain 3: analysis and findings**

#### 17 Data analysis

- 18
- 19
- 20
- 21 24. Number of data coders - Page 6
- 22
- 23 25. Description of the coding tree - Page 6
- 24
- 25 26. Derivation of themes - Page 6, 7 and 8
- 26
- 27 27. Software - Page 6
- 28
- 29 28. Participant checking – X
- 30

#### 31 Reporting

- 32
- 33
- 34 29. Quotations presented – Page 8 to 17
- 35
- 36 30. Data and findings consistent – Page 8 to 17
- 37
- 38 31. Clarity of major themes – Page 8 to 17
- 39
- 40 32. Clarity of minor themes – Page 8 to 17
- 41
- 42
- 43
- 44
- 45
- 46
- 47
- 48
- 49
- 50
- 51
- 52
- 53
- 54
- 55
- 56
- 57
- 58
- 59
- 60
