# Supplementary material for: Qualitative study exploring patients experiences of being diagnosed and living with primary bone cancer in the UK
Source: PubMed Central journal article supplement — BMJ Open. 2019 Sep 24;9(9):e028693. doi: 10.1136/bmjopen-2018-028693 (PMC6773292; doi:10.1136/bmjopen-2018-028693), 2019-09-24
Supplement: bmjopen-2018-028693supp001.pdf [file bmjopen-2018-028693supp001.pdf]

## Appendix 1 - Interview schedule

|                                                                      |                                                                                                                                                                                                                                                                                                                                                                                                                                                                                                                                                                                                                                                                                                                                                                                                                                                                                                |
|----------------------------------------------------------------------|------------------------------------------------------------------------------------------------------------------------------------------------------------------------------------------------------------------------------------------------------------------------------------------------------------------------------------------------------------------------------------------------------------------------------------------------------------------------------------------------------------------------------------------------------------------------------------------------------------------------------------------------------------------------------------------------------------------------------------------------------------------------------------------------------------------------------------------------------------------------------------------------|
| Welcome and introduction; Study aim; Participation & confidentiality | <p>Thank you for agreeing to take part in this study. I want to remind you that what we talk about will be kept confidential. Nothing you say will be shared with your healthcare team. Only a report summary of the interviews will be given out. Your name will not be on the written record of your interview and the audio recording will be destroyed when the study is complete. Can I check that you are still happy to take part and for me to record the interview? If at any time you want to stop talking just let me know and I will stop.</p> <p>The reason I want to talk to you is to find out what it is like being diagnosed, treated and living with a sarcoma diagnosis. There may be things that have been challenging but also things that have been okay. I want to know about the things that are most important to you. Do you have any questions before we start?</p> |
| Diagnosis, treatment timeline and experiences                        | <p>Do you want to tell me about the time you found out you had sarcoma?</p> <ul style="list-style-type: none"> <li>• <i>What type of sarcoma do you have [location]?</i></li> <li>• <i>What was your treatment(s) experience?</i></li> <li>• <i>What was your care experience [place of care and delivery of care]?</i></li> <li>• <i>Where are you now in the journey [treatment end, relapse etc.]?</i></li> <li>• <i>If treatment ended, how long ago?</i></li> </ul>                                                                                                                                                                                                                                                                                                                                                                                                                       |
| Physical health                                                      | <p>How satisfied are you with your health? (If not, then explore why not)</p> <p>How important is was physical health to you?</p> <p>How do you ensure you are living a healthy life?</p> <p>Is your physical health impaired due to their sarcoma [amputation, general weakness, pain, fatigue]?</p> <ul style="list-style-type: none"> <li>• <i>Do you need anyone to help you with activities of daily living (washing, dressing, going to the toilet)?</i></li> <li>• <i>Establish this is due to sarcoma and not present pre-diagnosis</i></li> <li>• <i>How do you feel about this?</i></li> <li>• <i>Do you have any late-effects (if some time out of treatment) – impact on general well-being</i></li> </ul>                                                                                                                                                                         |
| Emotional health                                                     | <p>How have you been feeling in the last 3 months?</p> <ul style="list-style-type: none"> <li>• <i>Do you feel sad [prompts – feel low, anxious, depressed]? How often?</i></li> <li>• <i>If they do, explore what triggers this, what they do about it, how often it happens</i></li> <li>• <i>Have they been able to access any professional help (if they wanted it and ease of accessing it)</i></li> </ul> <p>How do you feel about your body image and appearance?</p>                                                                                                                                                                                                                                                                                                                                                                                                                   |
| Social well-being                                                    | <p>Are you employed/in education? (Explore how this has been since diagnosis)</p> <ul style="list-style-type: none"> <li>• Have there been any challenges?</li> <li>• Have new opportunities been available that weren't pre-diagnosis?</li> </ul> <p>How has your relationship with other people been since your diagnosis?</p> <ul style="list-style-type: none"> <li>• <i>Explore impact on family, friends and changes in relationships.</i></li> <li>• <i>For patients over 16, explore sexual identify/sex life</i></li> </ul> <p>How has your diagnosis affected your financial well-being?</p> <p>Do you have opportunities for leisure activities?</p>                                                                                                                                                                                                                                |
| Final comments and wrap up                                           | <p>Any other information you feel is important for me to know, but that I didn't ask about?</p> <p>Thank you for sharing your experiences with us.</p>                                                                                                                                                                                                                                                                                                                                                                                                                                                                                                                                                                                                                                                                                                                                         |
